# Supplementary material for: Effectiveness of new legislation on partial sickness benefit on work participation: a quasi-experiment in Finland
Source: PubMed Central journal article supplement — BMJ Open. 2014 Dec 24;4(12):e006685. doi: 10.1136/bmjopen-2014-006685 (PMC4281551; doi:10.1136/bmjopen-2014-006685), 2014-12-24
Supplement: bmjopen-2014-006685.draft_revisions.pdf [file bmjopen-2014-006685.draft_revisions.pdf]

# BMJ Open

## Effectiveness of introduction of new legislation of partial sickness benefit on work participation: A quasi-experiment in Finland

|                                 |                                                                                                                                                                                                                                                                                                                                                                                           |
|---------------------------------|-------------------------------------------------------------------------------------------------------------------------------------------------------------------------------------------------------------------------------------------------------------------------------------------------------------------------------------------------------------------------------------------|
| Journal:                        | <i>BMJ Open</i>                                                                                                                                                                                                                                                                                                                                                                           |
| Manuscript ID:                  | bmjopen-2014-006685                                                                                                                                                                                                                                                                                                                                                                       |
| Article Type:                   | Research                                                                                                                                                                                                                                                                                                                                                                                  |
| Date Submitted by the Author:   | 19-Sep-2014                                                                                                                                                                                                                                                                                                                                                                               |
| Complete List of Authors:       | Kausto, Johanna; Finnish Institute of Occupational Health, Viikari-Juntura, Eira; Finnish Institute of Occupational Health, Virta, Lauri; Social Insurance Institution, Gould, Raija; Finnish Centre for Pensions, Koskinen, Aki; Finnish Institute of Occupational Health, Solovieva, Svetlana; Finnish Institute of Occupational Health, Center of Expertise for Health and workability |
| <b>Primary Subject Heading</b>: | Public health                                                                                                                                                                                                                                                                                                                                                                             |
| Secondary Subject Heading:      | Epidemiology                                                                                                                                                                                                                                                                                                                                                                              |
| Keywords:                       | partial sick leave, sick leave, work disability, population registers                                                                                                                                                                                                                                                                                                                     |
|                                 |                                                                                                                                                                                                                                                                                                                                                                                           |

SCHOLARONE™  
Manuscripts

1  
2  
3  
4  
5  
6  
7  
8  
9  
10  
11  
12  
13  
14  
15  
16  
17  
18  
19  
20  
21  
22  
23  
24  
25  
26  
27  
28  
29  
30  
31  
32  
33  
34  
35  
36  
37  
38  
39  
40  
41  
42  
43  
44  
45  
46  
47  
48  
49  
50  
51  
52  
53  
54  
55  
56  
57  
58  
59  
60

# EFFECTIVENESS OF INTRODUCTION OF NEW LEGISLATION OF PARTIAL SICKNESS BENEFIT ON WORK PARTICIPATION: A QUASI- EXPERIMENT IN FINLAND

Johanna Kausto<sup>1</sup>, Eira Viikari-Juntura<sup>1</sup>, Lauri J Virta<sup>2</sup>, Raija Gould<sup>3</sup>, Aki Koskinen<sup>1</sup>, Svetlana Solovieva<sup>1</sup>

<sup>1</sup> Finnish Institute of Occupational Health, Helsinki, Finland

<sup>2</sup> The Social Insurance Institution of Finland (SII), Turku, Finland

<sup>3</sup> Finnish Centre for Pensions, Helsinki, Finland

[johanna.kausto@ttl.fi](mailto:johanna.kausto@ttl.fi)

[eira.viikari-juntura@ttl.fi](mailto:eira.viikari-juntura@ttl.fi)

[lauri.virta@kela.fi](mailto:lauri.virta@kela.fi)

[raija.gould@etk.fi](mailto:raija.gould@etk.fi)

[aki.koskinen@ttl.fi](mailto:aki.koskinen@ttl.fi)

[svetlana.solovieva@ttl.fi](mailto:svetlana.solovieva@ttl.fi)

**Corresponding author:**

Johanna Kausto, Topeliuksenkatu 41 aA,  
00250 Helsinki, Finland  
Tel.: +358 30 474 2509  
E-mail: [johanna.kausto@ttl.fi](mailto:johanna.kausto@ttl.fi)

Word count: 4125

Number of tables: 3

Number of figures: 1

Key words: partial sick leave, sick leave, work disability, population registers

## Abstract

**Objectives** The objective of the study was to examine the effect of new legislation on partial sickness benefit on subsequent work participation of Finns with long term sickness absence. Additionally, we investigated whether the effect differed by sex, age, or diagnostic category.

**Design** A register based quasi-experimental study. We compared the intervention (partial sick leave) group with the comparison (full sick leave) group regarding their pre-post differences in the outcome. The pre-intervention and post-intervention study period each consisted of 365 days.

**Setting** Nationwide, individual level data on the beneficiaries of partial or full sickness benefit in 2008 were obtained from national sickness insurance, pension and earnings registers.

**Participants** 1 738 persons in the intervention and 56 754 persons in the comparison group.

**Outcome** Work participation, measured as the proportion (%) of time within 365 days when participants were in gainful employment and did not receive either partial or full ill-health-related or unemployment benefits.

**Results** Although the overall work participation declined in both groups during the study period, the decline was 5% (absolute difference-in-differences) smaller in the intervention group than in the comparison group, with a minor sex difference. The beneficial effect of partial sick leave was seen especially among those aged from 45 to 54 (5%) and 55 to 65 (6%) and in mental disorders (13%). When the groups were rendered more exchangeable (propensity score-matching), the effects on work participation were doubled and seen in all age groups and in other diagnostic categories than traumas.

**Conclusions** The results suggest that the new legislation has potential to increase work participation of the population with long term sickness absence in Finland. If applied in a larger

1  
2  
3  
4  
5  
6  
7  
8  
9  
10  
11  
12  
13  
14  
15  
16  
17  
18  
19  
20  
21  
22  
23  
24  
25  
26  
27  
28  
29  
30  
31  
32  
33  
34  
35  
36  
37  
38  
39  
40  
41  
42  
43  
44  
45  
46  
47  
48  
49  
50  
51  
52  
53  
54  
55  
56  
57  
58  
59  
60

scale, partial sick leave may turn out to be a useful tool in reducing the withdrawal of workers from the labor market due to health reasons.

For peer review only

## Article Summary

Strengths and limitations of the study:

- Applying nationally representative population register based data with valid information on the payment of health- and unemployment-related allowances in Finland.
- Applying a quasi-experimental study-design with difference-in differences and propensity score analysis to control for selection on both observed and unobserved factors.
- Registers provided only a limited number of background characteristics.

## Introduction

The need to increase work participation of working age people is currently a matter of concern in many Western countries. In Finland, delayed or lacking labor market attachment of young people, absence from work during later years and early exit from labor market have all raised alarm. To counteract these trends, an active labor market policy has been adopted, including the introduction of partial social security benefits and other tools to increase the so called flexicurity of the labor market [1]. In Finland, legislation on partial sickness benefit was introduced in 2007. The new benefit allowed for the first time to combine part-time sick-leave with part-time work.

The Finnish social insurance is based on the Nordic Model. Everyone who is aged from 16 to 67, non-retired and living permanently in the country (employees, self-employed, students, unemployed job seekers and those on sabbatical or alternation leave) and also nonresidents working for at least four months in Finland are covered by statutory sickness insurance. The sickness allowances are financed by employers, employees and the state and they are administrated by the Social Insurance Institution of Finland (SII). Statutory benefits can rest on previous earnings or benefits or the minimum allowance can be granted. For the earnings-related occupational sickness benefits, a minimum of three months of employment is required.

At present, the Finnish national sickness benefit scheme includes a full and a partial sickness benefit. A medical certificate is an absolute requirement for the two sickness benefits to be granted. In order to be eligible for the partial benefit an employee has to be eligible for a full benefit as well, but according to medical judgment partial return to work is safe enough. Partial sick leave is thus alternative to full sick leave and it is always medically certified. During the first years after introducing the partial sickness benefit in Finland, a partial sick leave had to be directly preceded by a period of full sick leave of at least 60 days and the partial sickness benefit could be granted from a minimum of 12 to a maximum of 72 working days. During partial sick leave, work time and salary are reduced by 40 – 60% of the regular work hours and work tasks can be modified if necessary. The employee and the employer sign a fixed term

1  
2  
3  
4 work contract for the part-time work. In Finland, the use of partial sick leave is voluntary for  
5  
6 the individual. The employer, as well, is entitled to decline the use of the benefit in case the  
7  
8 work arrangements needed at the work place are not feasible.  
9

10  
11 Sickness absence rates are in many countries higher among women compared with men [2].  
12  
13 Also partial sick leave has been more frequently used by women [3]. It is known that sickness  
14  
15 absence increases with age [2]. It is also recognized that challenges of return to work are  
16  
17 different for example in musculoskeletal diseases and mental disorders. In the latter category,  
18  
19 the outflow from disability benefits due to recovery has been lower [4].  
20  
21

22  
23 The current evidence on the effects of partial sick leave on return to work or work participation  
24  
25 is partly inconsistent. In the other Nordic countries, partial sick leave has been found to  
26  
27 increase the likelihood of return to regular working hours [5, 6] and to be associated with  
28  
29 higher subsequent employment rate [7]. No effect of active sick leave (return to work to  
30  
31 modified duties) on the average number of sick leave days or long term disability was detected  
32  
33 in a Norwegian cluster randomized controlled trial [8]. There is some discrepancy in the  
34  
35 findings on the effectiveness of partial sick leave in mental disorders. A Danish study [9] found  
36  
37 no effect, whereas a Swedish study [10] reported a weak effect of partial sick leave on full  
38  
39 recovery in the beginning of work disability due to mental disorders and a stronger effect when  
40  
41 partial sick leave was assigned after 60 days of full sick leave.  
42  
43

44  
45 In a randomized controlled trial among persons with musculoskeletal disorders we found that  
46  
47 early part-time sick leave predicted faster sustained return to work than full sick leave [11].  
48  
49 The beneficial effect of partial sick leave on work retention was also observed at population  
50  
51 level [12, 13]. Partial sick leave was associated in the short term with decreased work  
52  
53 retention, in terms of increased subsequent sickness absence. In the long term it was  
54  
55 associated with increased work retention, in terms of increased subsequent use of partial  
56  
57 disability pension and decreased use of full disability pension. These findings imply the  
58  
59 necessity to use an outcome that simultaneously accounts for different indicators of work  
60

1 participation. Some of these previous observational studies have suffered from limited data  
2 samples and narrow generalizability of findings [5, 9], self-reported data [9], and  
3 incomprehensive operationalization and measurement of work participation [5, 6, 10, 12, 13].  
4  
5  
6  
7  
8

9  
10 In order for policy makers to be able to make well informed decisions in the area of social and  
11 health policies, scientific evaluation of the effectiveness of population level interventions, e.g.  
12 introducing new legislation or policy change is needed [14]. Natural or quasi-experiments  
13 have successfully been used in connection with various population level interventions in the  
14 field of public health when planned experimentation, i.e. manipulation of exposure, has not  
15 been possible [15]. In the field of work disability research, this approach has, however been  
16 rare [2].  
17  
18  
19  
20  
21  
22  
23  
24

25 This study examined the effects of the new Finnish legislation on partial sickness benefit on  
26 subsequent work participation. For this we compared beneficiaries of partial sickness benefit  
27 with those receiving full sickness benefit a year after the law on partial sick leave was enacted.  
28 We utilized a quasi-experimental design with an integrated measure of work participation.  
29 Analyses were carried out in an individual level register based data representative of the  
30 Finnish working population with long-term sickness absence. We examined whether the effects  
31 of partial sick leave on subsequent work participation differed by sex, age, or diagnostic  
32 category of the benefit receivers.  
33  
34  
35  
36  
37  
38  
39  
40  
41  
42  
43  
44

## 45 **Methods**

### 46 *Study design and setting*

47  
48  
49 The population level intervention of interest in this study was the introduction of partial sick  
50 leave in Finland in 2007. We conducted a quasi-experimental study following recent guidelines  
51 on evaluating population health interventions [15]. This design was chosen to minimize the  
52 effect of both measured and unmeasured confounding. We compared the intervention (partial  
53 sick leave) group with the comparison (full sick leave) group regarding their pre-post  
54  
55  
56  
57  
58  
59  
60



1 differences in work participation. The pre-intervention (T1) and post-intervention (T2) study  
2 period each consisted of 365 days. A wash-out-period of one year was set between the sick  
3 leave period and T1 and T2 periods in order to obtain a robust effect of the intervention on  
4 work participation (Figure 1). These time-windows were allowed to move according to the  
5 timing of the individual's sick leave period.  
6  
7  
8  
9  
10

11  
12  
13 <Figure 1>  
14

15  
16  
17 Individual level data were derived from the national sickness insurance register of the SII and  
18 the pension and earnings registers of the Finnish Centre for Pensions. Data from these three  
19 registers were linked on the basis of social security numbers of the participants. The social  
20 insurance register provided information on all medically certified and compensated sickness  
21 absence spells, temporary and permanent national disability pensions, and old age pensions in  
22 Finland. The registers of the Finnish Centre for Pensions contained information on employment  
23 periods, earnings-related pensions and unsalaried periods due to disability, rehabilitation or  
24 unemployment. Written consent from the individuals was not needed as only encrypted  
25 register data were obtained by the researchers carrying out the analyses in the Finnish  
26 Institute of Occupational Health.  
27  
28  
29  
30  
31  
32  
33  
34  
35  
36  
37  
38

### 39 *Participants*

40 Participants that were granted a partial sickness benefit (intervention group) were compared  
41 with those who received a full sickness benefit (comparison group). A total sample of  
42 individuals who had received either partial sickness benefit (n = 1 838) or full sickness benefit  
43 (n = 67 086) in 2007 - 2008 and whose compensated sickness absence period had ended  
44 between 1 January and 31 December 2008 was drawn from the national sickness insurance  
45 register. Since a full time sickness absence of 60 working days had to precede partial sick  
46 leave, only those with full sick leave ending with an uninterrupted period of at least 60 days of  
47 payment of the benefit were included in the total sample. Thus, in our sample, receivers of full  
48 sickness benefit had not received partial sickness benefit, but they would have been entitled to  
49 it as for the length of the preceding full time sickness absence.  
50  
51  
52  
53  
54  
55  
56  
57  
58  
59  
60

1  
2  
3  
4 Since eligibility for a partial sickness benefit required a prior work contract, we excluded from  
5 the analyses those who did not have any employment periods (n=2 and n=4 923) during the  
6 entire study period. We additionally excluded those who had died (n=24 in the partial sick  
7 leave group and n=2 600 in the full sick leave group) or moved to old age pension (n=1 and  
8 n=354, respectively), had not turned 16 at the time of the first data collection period (T1)  
9 (n=3) or whose sickness absence periods (ending in 2008) extended beyond the time-frame of  
10 data collection (n=66 and n=1 024). The final sample included 1 738 participants in the partial  
11 sick leave group and 56 754 participants in the full sick leave group. We focused our analyses  
12 in the four main diagnostic groups in which partial sickness benefit has most frequently been  
13 used, i.e. musculoskeletal diseases, mental disorders, traumas and tumors (M, F, S and T, and  
14 C and D-categories in ICD-10, respectively). All other diagnoses were merged in one group.  
15  
16  
17  
18  
19  
20  
21  
22  
23  
24  
25  
26

#### 27 *Outcome measure*

28  
29  
30 Work participation was operationalized as the time the individuals were likely to have actually  
31 participated in gainful employment. It was approximated as the proportion (%) of time within  
32 365 days when participants had an employment contract and did not receive either partial or  
33 full ill-health-related benefits (sickness benefits, rehabilitation allowances, disability pensions)  
34 or unemployment benefits. Work participation was calculated for T1 and T2. It was assumed  
35 that when receiving partial benefits, the participants worked half of the work time (which is  
36 typically the case in Finland).  
37  
38  
39  
40  
41  
42  
43  
44

#### 45 *Covariates*

46  
47  
48 Data on sex, dates of birth and death, insurance district (region), annual gross income in  
49 2007, diagnostic codes (ICD-10), and occupational branch were obtained from the sickness  
50 insurance register. Information on occupation was available for all participants in the  
51 intervention group and for a random sample of 7.7% of the participants in the comparison  
52 group.  
53  
54  
55  
56  
57  
58  
59  
60

## Data analyses

The distributions of all variables were compared between the total full sickness benefit group (n = 67 086) and the subsample of those participants in the full sickness benefit group for whom the registers provided information on occupational branch (n = 4 347). Since no differences in the distributions were detected, we assumed that information on occupational branch was missing at random. Multiple imputation was used to compensate for the missing data on occupational branch in the comparison group. For this, we generated multiple imputed data sets (n=10) using the *proc mi* of SAS. The imputation model included all covariates.

Propensity score with 1:1 matching was used to match individuals on the probability that they would belong to the intervention (partial sick leave) group. Individuals that were matched to each other had equal or nearly equal (close enough) estimated propensity scores.

Difference-in differences- (DID-) and propensity score- (PS-) analyses are methods that are complementary to each other and can be applied in causal inference to counter selection bias and confounding [16]. We applied the DID method alone and in combination with PS-matching. Combining methods to counter bias and confounding from different sources and comparing the results has been encouraged [15]. The DID-method can be applied to control for fixed unobserved individual differences and common trends.

The DID-method allows one to estimate the difference in pre-post, within subject, differences between the intervention and the comparison group. The effect of partial sick leave on work participation was consequently estimated as the difference in pre-post-differences (differences between T2 and T1) between partial and full sick leave groups. The effect was estimated using general linear model with repeated measures design. F-statistic for the interaction term between the group assignment and change of work participation in time was applied as the difference-in-differences statistic.

Propensity score is defined as conditional probability of being exposed to a certain intervention given observed covariates [15, 17, 18]. It is applied to balance the covariates in two groups

1 and thus to reduce bias. We computed PS (i.e. probability of being exposed to partial sick  
2 leave) by logistic regression for all participants. The following set of variables and their  
3 interaction terms were included in the logistic regression model: age, sex, diagnostic category,  
4 income, occupation, insurance district, and work participation, sickness absence, rehabilitation  
5 periods and unemployment at T1. The model that balanced the covariates and work  
6 participation at T1 between the intervention and comparison group best and had the best  
7 model fit was chosen.  
8  
9  
10  
11  
12  
13  
14  
15

16  
17 Thereafter we matched the partial sick leave and full sick leave groups on the estimated  
18 propensity score using local optimal (greedy) algorithm [19]. The matching was performed  
19 within (sex x diagnostic category)-strata. Subsequently DID-analysis was also carried out in  
20 the matched subsample.  
21  
22  
23  
24  
25

26  
27 Several sensitivity analyses were carried out. The analyses were run separately for participants  
28 for whom the registers provided information on occupational branch and for the total sample in  
29 which imputed data on occupational branch were utilized for the comparison group. To  
30 examine the group difference in work participation at T1 (due to unemployment or sick leave)  
31 as source of reduced group comparability, the analyses were carried out separately among  
32 participants who did not receive unemployment benefits at T1 and among participants with  
33 100% of work participation at T1.  
34  
35  
36  
37  
38  
39  
40  
41  
42  
43  
44

## 45 **Results**

### 46 *Descriptive characteristics of the study population*

47  
48 Information on the background characteristics of the intervention and comparison group in the  
49 total analysed sample is shown in Table 1. Women constituted 71% of the partial sick leave  
50 group and 53% of the full sick leave group. The partial benefit was most common among those  
51 who were aged between 35 and 54, whereas the full benefit among those aged from 45 to 65.  
52 The income level of those in the partial sick leave group was higher than of those in the full  
53  
54  
55  
56  
57  
58  
59  
60

1 sick leave group. The partial sickness benefit was most often used in connection with mental  
2 disorders and musculoskeletal diseases, while the full benefit was most often used in  
3 musculoskeletal diseases. The use of the partial benefit was most frequent in social and  
4 healthcare services and administrative and office work, whereas the full benefit was most  
5 commonly used in industrial and service work. No large regional differences in the use of the  
6 benefits were detected.  
7  
8  
9  
10  
11  
12

13  
14  
15 <Table 1>  
16

17  
18  
19 *Difference-in-differences in work participation between partial and full sick leave group*  
20

21  
22  
23 In both groups the level of work participation decreased during the follow up, the absolute  
24 reduction being larger in the full sick leave group (-26.5%) compared with the partial sick  
25 leave group (-21.2%) (Table 2). The absolute overall difference-in-differences in work  
26 participation was 5.3% (95% CI 3.1% to 7.5%).  
27  
28  
29

30  
31  
32  
33 The difference-in-differences in work participation tended to be larger in men than in women.  
34 In all age categories, work participation declined more in the full than in the partial sick leave  
35 group. The difference in the decline was significant in age-categories 45-54 and 55-65. There  
36 was no effect in those aged 35-44. In the youngest age category (16-34 years) the difference-  
37 in-differences was large but statistically non-significant.  
38  
39  
40  
41  
42

43  
44  
45 A statistically significantly larger effect was found in mental disorders compared with the other  
46 diagnostic categories.  
47  
48

49  
50 <Table 2>  
51

52  
53  
54 The results found in the subsample of participants for whom the registers provided information  
55 on occupational branch were very similar to those in the total sample (data not shown). The  
56 exclusion of the participants who received unemployment benefits at T1 led to an absolute  
57  
58  
59  
60

1 increase in the difference-in-differences in work participation (DID 7.6%, 95% CI 5.4% to  
2 9.7%). The difference-in- differences in work participation increased further (DID 9.5%, 95%  
3 CI 6.8% to 12.1%) when participants with reduced work participation (for any reason) at T1  
4 were excluded from the analyses.  
5  
6  
7  
8  
9

10  
11  
12 *Difference-in-differences in work participation in the propensity score-matched subsample*  
13

14  
15  
16 The matching procedure resulted in a total of 1 660 matched pairs of participants. The  
17 propensity score matched partial sickness benefit receivers did not differ from full sickness  
18 benefit receivers with regard to age, gross income, number of unemployment days, sickness  
19 absence days, rehabilitation days or work participation at T1. There were some differences  
20 between the groups in the distribution of occupational branches and insurance districts  
21 (Appendix Table 1).  
22  
23  
24  
25  
26  
27

28  
29 The results from the DID-analysis in the PS-matched subsample are presented in Table 3. The  
30 absolute overall difference-in-differences was increased to 9.8% (95% CI 5.9 to 13.7). A  
31 tendency for a larger DID in men than in women was also found in this subsample. The DID  
32 was still largest in those participants aged over 45 years, but in contrast to the total sample an  
33 effect was seen in the younger age categories as well. Differences between the diagnostic  
34 categories were reduced as compared to the total sample. The largest effect was still found in  
35 mental disorders. In addition, a statistically significant DID was also found in musculoskeletal  
36 diseases and tumours. Further adjustment for the differences in the distribution of occupation  
37 and insurance district between the intervention and comparison group, had no effect on the  
38 results of the DID-analysis.  
39  
40  
41  
42  
43  
44  
45  
46  
47  
48  
49  
50

51  
52  
53 < Table 3 >  
54  
55  
56  
57  
58  
59  
60

## Discussion

### *Principal findings*

We applied a quasi-experimental design to study the population level effects of the introduction of partial sickness benefit in Finland among a working population with long term sickness absence. It was found that partial sick leave had a positive effect on work participation. Although the overall work participation declined from T1 to T2, at the population level the decline was 5% (absolute difference) smaller among the receivers of partial sickness benefit (intervention group) than among the receivers of full sickness benefit (comparison group). The beneficial effect of partial sick leave was seen especially among those aged from 45 to 54 and 55 to 65 and in mental disorders. No major sex difference was detected. When the groups were rendered more exchangeable, the effect on work participation was doubled, and effects were seen in other diagnostic categories than traumas and all age groups.

### *Validity of the study*

An observational quasi-experimental study design can be applied to assess the effects of a planned event or intervention, when randomized controlled trials are not ethical or feasible. Observational studies can also better simulate real-world settings and offer more relevant information in view of policy-making [20]. The internal validity of observational studies is lower than that of randomized controlled trials due to possible selection according to exposure. For this reason, an analytical approach called potential outcomes or counterfactual framework was chosen. The term refers to the fact that in an ideal situation the exposed would be compared to themselves when unexposed. Since this comparison is impossible, we need a comparable or exchangeable comparison group. We utilized two methods (DID and PS) that have been previously recommended and applied to control for selection on both observed factors and unobserved fixed factors [15, 20, 21].

1 In the DID- method, it is assumed that the unobserved characteristics in the studied groups  
2 are stable and that the outcomes would change identically in these groups in the absence of  
3 intervention. Consequently, the intervention and comparison groups should be identical,  
4 except for the intervention status. However, it is sufficient that the groups are closely, though  
5 not exactly, similar [15]. We included in the comparison group only participants who would  
6 have been entitled to partial sickness benefit as for the length of the preceding sickness  
7 absence. We also applied a short wash-out period, to minimize the intragroup differences  
8 between the two time points. However, as full information on the eligibility of the participants  
9 for partial sickness benefit was not available in the registers (e.g. severity of the health  
10 problem and degree of remaining workability), we utilized matching on PS to further increase  
11 the exchangeability of the groups.  
12  
13  
14  
15  
16  
17  
18  
19  
20  
21  
22  
23  
24

25 We utilized nationwide population data with comprehensive individual level register based  
26 information on ill-health- and unemployment-related absences from work. Personal  
27 identification (social security) numbers enabled linking information from three separate source  
28 registers. These registers have originally been established for administrative purposes, but the  
29 data can also be used for research [22]. Among the advantages of register based studies is a  
30 low likelihood of selection and attrition bias. The source registers of this study provided valid  
31 information on the receivers and payment days of the benefits. A weakness of the registers is  
32 that they typically provide only a limited number of background characteristics of the  
33 participants and other covariates. The process of assignment to partial sick leave is complex  
34 and it is affected by many actors (the patient, physician, employer, and workplace) for which  
35 information cannot be found in the national registers. Nevertheless, the factors that were  
36 included in the analyses have earlier been found to be important predictors of the use of  
37 health-related social security benefits and also associated with work disability and return to  
38 work.  
39  
40  
41  
42  
43  
44  
45  
46  
47  
48  
49  
50  
51  
52  
53  
54

55 Information on diagnoses for sickness benefits was as well retrieved from registers and was  
56 based on medical assessment. In case of a long term sickness absence (lasting more than 60  
57 days) in Finland, the sickness benefit is paid in shorter periods, each being covered with a  
58  
59  
60



1  
2  
3  
4  
5  
6  
7  
8  
9  
10  
11  
12  
13  
14  
15  
16  
17  
18  
19  
20  
21  
22  
23  
24  
25  
26  
27  
28  
29  
30  
31  
32  
33  
34  
35  
36  
37  
38  
39  
40  
41  
42  
43  
44  
45  
46  
47  
48  
49  
50  
51  
52  
53  
54  
55  
56  
57  
58  
59  
60

separate medical certificate. Diagnostic codes are transferred from these certificates to the administrative registers. We used the latest (and presumably the most accurate) diagnostic code provided for each long term sickness absence in 2007-2008. Data on occupational branch had to be imputed for the majority of participants in the comparison group. Nevertheless, the sensitivity analyses suggested that using imputed data on occupation did not affect the results. In contrast to earlier studies on the topic, work participation was approximated in the current study by taking simultaneously into account the rate of different ill-health- and unemployment-related benefits. We operationalized work participation as proportion of time within a year not receiving ill-health related or unemployment benefits. Hence we had a relatively comprehensive indicator of the availability of the participants for the labour market.

#### *Results in relation to earlier findings*

The overall results of this study are congruent with earlier findings, indicating positive effects of partial sick leave on return to work and work retention [5-7, 12]. We found that partial sick leave had a positive effect on future work participation especially in mental disorders, but the results of the analyses in the subgroup suggested that the overall effect in the total sample might be underestimated.

Our findings on the usefulness of partial sick leave in mental disorders, though not directly comparable, are congruent with a study showing beneficial effects of partial sick leave on RTW in mental disorders after 60 days of full sick leave [10], but differ from an earlier study reporting no effect [9]. The literature suggests that returning and continuing at work may be more challenging for those with mental disorders than with somatic problems (e.g. musculoskeletal diseases) [23-25]. In addition, the outflow from disability benefits due to recovery has been lower among those with mental disorders than with musculoskeletal diseases [4]. However, in our previous study we found an effect of partial sick leave on work disability pension in both diagnostic categories, the effect tending to be larger in mental disorders than in musculoskeletal diseases [12]. The diagnostic groups of musculoskeletal

1 diseases and mental disorders may differ in the degree of comparability of the partial and full  
2 sick leave groups with regard to the background characteristics, severity of the health problem  
3 and remaining work ability, number of sickness absences as well as in transition to  
4 rehabilitation and unemployment. When the exchangeability of the groups was increased with  
5 propensity score matching, a beneficial effect on work participation was detected also in  
6 persons with musculoskeletal diseases and those with tumours.  
7  
8  
9  
10  
11  
12

13  
14  
15 Sickness absence is known to increase with age [26]. In addition, it has been found that return  
16 to work after long term sickness absence is less likely at higher ages [27, 28]. Partial sick  
17 leave was found to be most frequently used and also most effective among middle-aged and  
18 older workers. It may well be that work arrangements associated with partial sick leave are  
19 more easily implemented by employees in a more established or stable work situation.  
20  
21  
22  
23  
24  
25  
26  
27  
28

## 29 **Conclusions**

30  
31  
32  
33 The overall results of the effectiveness of partial sick leave on work participation suggest that  
34 the new legislation on partial sickness benefit introduced in 2007 has potential to increase  
35 work participation of the working population with long term sickness absence in Finland. A  
36 positive effect was seen especially in mental disorders. In the future – if applied in a larger  
37 scale – partial sick leave may turn out to be an effective tool in reducing temporary and  
38 permanent withdrawal of workers from the labour market due to health reasons.  
39  
40  
41  
42  
43  
44  
45

## 46 **Figure legend**

47  
48  
49  
50 Figure. Schematic presentation of the study design and difference-in-differences method. (T1  
51 corresponds to pre-intervention period, T2 corresponds to post-intervention period).  
52  
53  
54  
55  
56  
57  
58  
59  
60

### CONTRIBUTORSHIP STATEMENT

JK, SS, EVJ, LJV and AK designed the study. All authors were involved in data collection. JK, SS and AK conducted the analyses, all contributed to the interpretation of the results and JK, SS and EVJ drafted the manuscript. All authors accepted the final version of the manuscript.

### COMPETING INTERESTS

None

### DATA SHARING STATEMENT

No additional data available

### References

1. Philips , E.R., Alloja J, Krillo K, Lauringson A, *Approaches to flexicurity: EU-models*. 2007, European foundation for the improvement of living and working conditions.
2. OECD, *Sickness, Disability and Work: Breaking the Barriers: A Synthesis of Findings across OECD countries*, OECD Publishing. 2010.
3. Kausto, J., et al., *Partial sick leave--review of its use, effects and feasibility in the Nordic countries*. Scand J Work Environ Health, 2008. **34**(4): p. 239-49.
4. OECD, *Sick on the job? Myths and Realities about Mental Health and Work*, in *Mental health and Work*,. 2012, OECD Publishing.
5. Andren, D. and M. Svensson, *Part-time sick leave as a treatment method for individuals with musculoskeletal disorders*. Journal of occupational rehabilitation, 2012. **22**(3): p. 418-26.
6. Hogelund, J., A. Holm, and J. McIntosh, *Does graded return-to-work improve sick-listed workers' chance of returning to regular working hours?* Journal of health economics, 2010. **29**(1): p. 158-69.
7. Markussen, S., A. Mykletun, and K. Roed, *The case for presenteeism - Evidence from Norway's sickness insurance program*. Journal of Public Economics, 2012. **96**(11-12): p. 959-972.
8. Scheel, I.B., et al., *Blind faith? The effects of promoting active sick leave for back pain patients: a cluster-randomized controlled trial*. Spine (Phila Pa 1976), 2002. **27**(23): p. 2734-40.
9. Hogelund, J., A. Holm, and L.F. Eplov, *The effect of part-time sick leave for employees with mental disorders*. The journal of mental health policy and economics, 2012. **15**(4): p. 157-70.
10. Andren, D., *Does part-time sick leave help individuals with mental disorders recover lost work capacity?* J Occup Rehabil, 2014. **24**(2): p. 344-60.
11. Viikari-Juntura, E., et al., *Return to work after early part-time sick leave due to musculoskeletal disorders: a randomized controlled trial*. Scandinavian journal of work, environment & health, 2012. **38**(2): p. 134-43.
12. Kausto, J., et al., *Partial sick leave associated with disability pension: propensity score approach in a register-based cohort study*. BMJ open, 2012. **2**(6).
13. Kausto, J., et al., *Associations between partial sickness benefit and disability pensions: initial findings of a Finnish nationwide register study*. BMC Public Health, 2010. **10**: p. 361.
14. Grimshaw, J., et al., *Experimental and quasi-experimental designs for evaluating guideline implementation strategies*. Family practice, 2000. **17 Suppl 1**: p. S11-6.
15. Craig, P., et al., *Using natural experiments to evaluate population health interventions: new Medical Research Council guidance*. Journal of Epidemiology and Community Health, 2012. **66**(12): p. 1182-1186.
16. Ding, Y.Y., *Risk adjustment: towards achieving meaningful comparison of health outcomes in the real world*. Ann Acad Med Singapore, 2009. **38**(6): p. 552-7.
17. D'Agostino, R.B., Jr., *Propensity score methods for bias reduction in the comparison of a treatment to a non-randomized control group*. Stat Med, 1998. **17**(19): p. 2265-81.
18. Pattanayak, C.W., D.B. Rubin, and E.R. Zell, *Propensity score methods for creating covariate balance in observational studies*. Rev Esp Cardiol (Engl Ed), 2011. **64**(10): p. 897-903.
19. Coca-Perrailon, M., *Local and global optimal propensity score matching*. . SAS Global Forum 2007(185).
20. Remler, D.K. and G.G. Van Ryzin, *Research Methods in Practice. Strategies for Description and Causation*. 2011: SAGE Publications, Inc. 616.

- 1
  - 2
  - 3
  - 4
  - 5
  - 6
  - 7
  - 8
  - 9
  - 10
  - 11
  - 12
  - 13
  - 14
  - 15
  - 16
  - 17
  - 18
  - 19
  - 20
  - 21
  - 22
  - 23
  - 24
  - 25
  - 26
  - 27
  - 28
  - 29
  - 30
  - 31
  - 32
  - 33
  - 34
  - 35
  - 36
  - 37
  - 38
  - 39
  - 40
  - 41
  - 42
  - 43
  - 44
  - 45
  - 46
  - 47
  - 48
  - 49
  - 50
  - 51
  - 52
  - 53
  - 54
  - 55
  - 56
  - 57
  - 58
  - 59
  - 60
21. Gebel, M. and J. Vossemer, *The impact of employment transitions on health in Germany. A difference-in-differences propensity score matching approach*. Soc Sci Med, 2014. **108**: p. 128-36.
22. Gissler, M. and J. Haukka, *Finnish health and social welfare registers in epidemiological research*. Norsk Epidemiologi, 2004. **14**(1): p. 113-120.
23. Briand, C., et al., *Work and mental health: learning from return-to-work rehabilitation programs designed for workers with musculoskeletal disorders*. International journal of law and psychiatry, 2007. **30**(4-5): p. 444-57.
24. Thornicroft, G., et al., *Reducing stigma and discrimination: Candidate interventions*. International journal of mental health systems, 2008. **2**(1): p. 3.
25. van Oostrom, S.H., et al., *Development of a workplace intervention for sick-listed employees with stress-related mental disorders: Intervention Mapping as a useful tool*. BMC health services research, 2007. **7**: p. 127.
26. Allebeck, P. and A. Mastekaasa, *Swedish Council on Technology Assessment in Health Care (SBU). Chapter 5. Risk factors for sick leave - general studies*. Scandinavian journal of public health. Supplement, 2004. **63**: p. 49-108.
27. Steenstra, I.A., *Prognostic factors for duration of sick leave in patients sick listed with acute low back pain: a systematic review of the literature*. Occupational and Environmental Medicine, 2005. **62**(12): p. 851-860.
28. Cornelius, L.R., et al., *Prognostic Factors of Long Term Disability Due to Mental Disorders: A Systematic Review*. Journal of Occupational Rehabilitation, 2010. **21**(2): p. 259-274.

Table 1. Characteristics of participants in partial and full sick leave group at the time of intervention (n, %).

|                                          | Partial sick leave n =1738 | Full sick leave n = 56 754        |
|------------------------------------------|----------------------------|-----------------------------------|
| <b>Sex (%)</b>                           |                            |                                   |
| Female                                   | 1 236 (71.1)               | 30 058 (53.0)                     |
| <b>Age (years) (%)</b>                   |                            |                                   |
| 16–34                                    | 217 (12.5)                 | 10 901 (19.2)                     |
| 35–44                                    | 430 (24.7)                 | 11 231 (19.8)                     |
| 45–54                                    | 753 (43.3)                 | 18 740 (33.0)                     |
| 55–65                                    | 338 (19.5)                 | 15 882 (28.0)                     |
| Mean (SD)                                | 46.2 (9.0)                 | 45.7 (11.3)                       |
| <b>Annual gross income (€) (%)</b>       |                            |                                   |
| - 30 000                                 | 1 237 (71.2)               | 46 119 (81.3)                     |
| 30 001 – 60 000                          | 409 (23.5)                 | 9 593 (16.9)                      |
| 60 001 -                                 | 39 (2.2)                   | 732 (1.3)                         |
| Missing                                  | 53 (3.1)                   | 310 (0.5)                         |
| Median                                   | 24 618                     | 20 668                            |
| <b>Diagnostic categories (%)</b>         |                            |                                   |
| Mental disorders                         | 663 (38.2)                 | 14 255 (25.1)                     |
| Musculoskeletal diseases                 | 624 (35.9)                 | 20 613 (36.3)                     |
| Tumours                                  | 112 (6.4)                  | 3 031 (5.4)                       |
| Traumas                                  | 136 (7.8)                  | 8 416 (14.8)                      |
| Other                                    | 203 (11.7)                 | 10 439 (18.4)                     |
| <b>Insurance district (%)</b>            |                            |                                   |
| Northern                                 | 219 (12.6)                 | 7 764 (13.7)                      |
| Western                                  | 259 (14.9)                 | 7 824 (13.8)                      |
| Eastern                                  | 194 (11.2)                 | 8 525 (15.0)                      |
| South-Western                            | 410 (23.6)                 | 13 254 (23.3)                     |
| Southern                                 | 656 (37.7)                 | 19 349 (34.1)                     |
| Missing                                  | 0 (0.0)                    | 38 (0.1)                          |
| <b>Occupational branch (%)</b>           |                            | (non-imputed subsample n = 4 347) |
| Technical and scientific work etc.       | 193 (11.1)                 | 409 (9.4)                         |
| Social and healthcare services           | 516 (29.7)                 | 719 (16.5)                        |
| Administration and office work           | 293 (16.9)                 | 413 (9.5)                         |
| Commercial work                          | 113 (6.5)                  | 288 (6.6)                         |
| Agriculture and forestry                 | 50 (2.9)                   | 214 (4.9)                         |
| Transport                                | 60 (3.4)                   | 269 (6.2)                         |
| Industrial and construction work, mining | 309 (17.8)                 | 1 146 (26.4)                      |
| Service work                             | 204 (11.7)                 | 889 (20.5)                        |

Table 2. Comparison of work participation (%) between partial and full sick leave group (GLM repeated measures design).

| Work participation (%)                      |        |                                               |                                               |                                             |       |                                           |             |       |
|---------------------------------------------|--------|-----------------------------------------------|-----------------------------------------------|---------------------------------------------|-------|-------------------------------------------|-------------|-------|
|                                             | n      | Pre-intervention period ( T1)<br>Mean (95%CI) | Post-intervention period (T2)<br>Mean (95%CI) | Post-Pre difference (T2-T1)<br>Mean (95%CI) | p     | Difference in differences<br>Mean (95%CI) | F-statistic | p     |
| <b>All<sup>1</sup></b>                      |        |                                               |                                               |                                             |       |                                           |             |       |
| Partial sick leave                          | 1 685  | 86.6 (85.2 to 88.1)                           | 65.4 (63.4 to 67.4)                           | -21.2 (-23.4 to -19.1)                      | 0.001 | 5.3 (3.1 to 7.5)                          | 22.8        | 0.001 |
| Full sick leave                             | 56 406 | 79.4 (79.1 to 79.6)                           | 52.9 (52.5 to 53.2)                           | -26.5 (-26.9 to -26.2)                      | 0.001 |                                           |             |       |
| <b>Males<sup>2</sup></b>                    |        |                                               |                                               |                                             |       |                                           |             |       |
| Partial sick leave                          | 490    | 86.6 (84.0 to 89.1)                           | 62.7 (59.0 to 66.5)                           | -23.9 (-27.9 to -19.9)                      | 0.001 | 6.3 (2.3 to 10.3)                         | 9.3         | 0.002 |
| Full sick leave                             | 26 507 | 80.3 (80.0 to 80.7)                           | 50.2 (49.7 to 50.7)                           | -30.1 (-30.7 to -29.6)                      | 0.001 |                                           |             |       |
| <b>Females<sup>2</sup></b>                  |        |                                               |                                               |                                             |       |                                           |             |       |
| Partial sick leave                          | 1 195  | 85.4 (83.7 to 87.0)                           | 66.9 (64.6 to 69.3)                           | -18.4 (-21.0 to -15.9)                      | 0.001 | 4.9 (2.4 to 7.5)                          | 14.2        | 0.001 |
| Full sick leave                             | 29 889 | 78.6 (78.2 to 78.9)                           | 55.2 (54.7 to 55.7)                           | -23.4 (-23.9 to -22.9)                      | 0.001 |                                           |             |       |
| <b>16-34 years<sup>1</sup></b>              |        |                                               |                                               |                                             |       |                                           |             |       |
| Partial sick leave                          | 210    | 89.3 (85.8 to 92.8)                           | 75.5 (70.2 to 80.9)                           | -13.8 (-19.6 to -8.0)                       | 0.001 | 2.8 (-1.1 to 10.6)                        | 2.5         | 0.111 |
| Full sick leave                             | 10 759 | 84.6 (84.1 to 85.1)                           | 66.1 (65.3 to 66.8)                           | -16.6 (-20.8 to -12.5)                      | 0.001 |                                           |             |       |
| <b>35-44 years<sup>1</sup></b>              |        |                                               |                                               |                                             |       |                                           |             |       |
| Partial sick leave                          | 424    | 84.7 (81.9 to 87.5)                           | 68.1 (64.2 to 72.0)                           | -16.6 (-20.8 to -12.5)                      | 0.001 | 2.0 (-2.2 to 6.2)                         | 0.9         | 0.352 |
| Full sick leave                             | 11 177 | 78.4 (77.9 to 79.0)                           | 59.8 (59.1 to 60.5)                           | -18.6 (-19.4 to -17.8)                      | 0.001 |                                           |             |       |
| <b>45-54 years<sup>1</sup></b>              |        |                                               |                                               |                                             |       |                                           |             |       |
| Partial sick leave                          | 725    | 86.9 (84.7 to 89.0)                           | 65.7 (62.6 to 68.8)                           | -21.1 (-24.4 to -17.9)                      | 0.001 | 4.7 (1.4 to 8.0)                          | 7.9         | 0.005 |
| Full sick leave                             | 18 659 | 77.6 (77.2 to 78.1)                           | 51.8 (51.2 to 52.4)                           | -25.9 (-26.5 to -25.2)                      | 0.001 |                                           |             |       |
| <b>55-65 years<sup>1</sup></b>              |        |                                               |                                               |                                             |       |                                           |             |       |
| Partial sick leave                          | 326    | 89.6 (86.3 to 92.9)                           | 57.0 (52.3 to 61.7)                           | -32.6 (-37.7 to -27.5)                      | 0.001 | 5.7 (0.5 to 10.8)                         | 4.7         | 0.03  |
| Full sick leave                             | 15 811 | 78.5 (78.0 to 78.9)                           | 40.2 (39.5 to 40.8)                           | -38.3 (-39.0 to -37.6)                      | 0.001 |                                           |             |       |
| <b>Musculoskeletal diseases<sup>3</sup></b> |        |                                               |                                               |                                             |       |                                           |             |       |
| Partial sick leave                          | 598    | 87.0 (84.8 to 89.3)                           | 60.3 (57.0 to 63.6)                           | -26.7 (-30.3 to -23.2)                      | 0.001 | 0.7 (-2.9 to 4.3)                         | 0.14        | 0.712 |
| Full sick leave                             | 20 537 | 79.7 (79.4 to 80.1)                           | 52.3 (51.7 to 52.9)                           | -27.4 (-28.0 to -26.8)                      | 0.001 |                                           |             |       |
| <b>Mental disorders<sup>3</sup></b>         |        |                                               |                                               |                                             |       |                                           |             |       |
| Partial sick leave                          | 645    | 84.6 (82.2 to 87.1)                           | 67.0 (63.8 to 70.3)                           | -17.6 (-21.3 to -13.9)                      | 0.001 | 12.8 (9.0 to 16.5)                        | 43.8        | 0.001 |
| Full sick leave                             | 14 136 | 74.6 (74.0 to 75.1)                           | 44.2 (43.5 to 44.9)                           | -30.4 (-31.1 to -29.6)                      | 0.001 |                                           |             |       |

Table 2. Continued.

| Work participation (%)                         |        |                                                  |                                                  |                                                |       |                                              |                 |       |
|------------------------------------------------|--------|--------------------------------------------------|--------------------------------------------------|------------------------------------------------|-------|----------------------------------------------|-----------------|-------|
|                                                | n      | Pre-intervention<br>period ( T1)<br>Mean (95%CI) | Post-intervention<br>period (T2)<br>Mean (95%CI) | Post-Pre difference<br>(T2-T1)<br>Mean (95%CI) | p     | Difference in<br>differences<br>Mean (95%CI) | F-<br>statistic | p     |
| <b>Traumas<sup>3</sup></b>                     |        |                                                  |                                                  |                                                |       |                                              |                 |       |
| Partial sick leave                             | 132    | 86.7 (82.0 to 91.3)                              | 68.1 (61.5 to 74.6)                              | -18.6 (-25.3 to -11.8)                         | 0.001 | -3.2 (-10.0 to 3.5)                          | 0.89            | 0.348 |
| Full sick leave                                | 8 312  | 82.9 (82.3 to 91.3)                              | 67.6 (66.7 to 68.4)                              | -15.3 (-16.2 to -14.5)                         | 0.001 |                                              |                 |       |
| <b>Tumours<sup>3</sup></b>                     |        |                                                  |                                                  |                                                |       |                                              |                 |       |
| Partial sick leave                             | 109    | 90.6 (85.9 to 95.4)                              | 75.0 (67.4 to 82.5)                              | -15.7 (-23.5 to -7.9)                          | 0.001 | 5.3 (-2.6 to 13.2)                           | 1.7             | 0.190 |
| Full sick leave                                | 3 021  | 87.2 (86.3 to 88.1)                              | 66.2 (64.8 to 67.6)                              | -21.0 (-22.4 to -19.5)                         | 0.001 |                                              |                 |       |
| <b>Other diagnostic categories<sup>3</sup></b> |        |                                                  |                                                  |                                                |       |                                              |                 |       |
| Partial sick leave                             | 201    | 87.4 (83.4 to 91.4)                              | 63.6 (57.8 to 69.4)                              | -23.8 (-30.0 to -17.6)                         | 0.001 | 6.2 (-0.05 to 12.5)                          | 3.8             | 0.052 |
| Full sick leave                                | 10 400 | 80.2 (79.6 to 80.7)                              | 50.1 (49.3 to 50.9)                              | -30.0 (-30.9 to -29.2)                         | 0.001 |                                              |                 |       |

Adjusted for <sup>1</sup> age, sex, income, diagnosis, occupational group, insurance district, <sup>2</sup> age, income, diagnosis, occupational group, insurance district, <sup>3</sup> age, sex, income, occupational group, insurance district.

Table 3. Comparison of work participation (%) between partial and full sick leave group (GLM repeated measures design) in the PS-matched subsample.

| Work participation (%)                         |           |                                            |             |        |
|------------------------------------------------|-----------|--------------------------------------------|-------------|--------|
|                                                | n (pairs) | Difference in differences<br>Mean (95% CI) | F-statistic | p      |
| <b>All<sup>1</sup></b>                         | 1 660     | 9.8 (5.9 to 13.7)                          | 60.8        | 0.0001 |
| <b>Males<sup>2</sup></b>                       | 489       | 12.4 (6.9 to 17.9)                         | 28.1        | 0.002  |
| <b>Females<sup>2</sup></b>                     | 1 171     | 7.2 (3.1 to 11.4)                          | 34.0        | 0.0001 |
| <b>16-34 years</b>                             | 209       | 8.5 (0.5 to 16.6)                          | 9.5         | 0.002  |
| <b>35-44 years</b>                             | 422       | 6.7 (0.7 to 12.6)                          | 9.8         | 0.002  |
| <b>45-54 years</b>                             | 708       | 11.1 (6.3 to 15.9)                         | 30.3        | 0.0001 |
| <b>55-65 years</b>                             | 321       | 12.9 (6.5 to 19.4)                         | 12.2        | 0.001  |
| <b>Musculoskeletal diseases<sup>3</sup></b>    | 598       | 6.3 (1.5 to 11.2)                          | 6.0         | 0.015  |
| <b>Mental disorders<sup>3</sup></b>            | 621       | 18.9 (14.2 to 23.5)                        | 59.9        | 0.0001 |
| <b>Traumas<sup>3</sup></b>                     | 131       | 0.3 (-9.3 to 9.9)                          | 0.0         | 0.99   |
| <b>Tumours<sup>3</sup></b>                     | 109       | 12.5 (1.8 to 23.2)                         | 5.9         | 0.016  |
| <b>Other diagnostic categories<sup>3</sup></b> | 201       | 11.1 (3.3 to 18.9)                         | 7.6         | 0.006  |

Adjusted for

<sup>1</sup> age, sex, income, diagnosis, occupational group, insurance district,

<sup>2</sup> age, income, diagnosis, occupational group, insurance district,

<sup>3</sup> age, sex, income, occupational group, insurance district.



## APPENDIX

Table 1. Characteristics of participants in partial and full sick leave group at the time of intervention (n, %). Propensity score-matched subsample (n=1660 pairs).

|                                           | Partial sick leave        | Full sick leave           |
|-------------------------------------------|---------------------------|---------------------------|
| <b>Female (%)</b>                         | 1 171 (70.5)              | 1 171 (70.5)              |
| <b>Age (years)</b>                        |                           |                           |
| Mean (95% CI)                             | 46.1 (45.7 to 46.5)       | 46.0 (45.5 to 46.5)       |
| <b>Annual gross income (€)</b>            |                           |                           |
| Mean (95% CI)                             | 27 302 (26 754 to 27 850) | 26 274 (25 637 to 26 910) |
| <b>Diagnostic categories (%)</b>          |                           |                           |
| Mental disorders                          | 621 (37.4)                | 621 (37.4)                |
| Musculoskeletal diseases                  | 598 (36.0)                | 598 (36.0)                |
| Tumours                                   | 109 (6.6)                 | 109 (6.6)                 |
| Traumas                                   | 131 (7.9)                 | 131 (7.9)                 |
| Other                                     | 201 (12.1)                | 201 (12.1)                |
| <b>Occupational branch (%)</b>            |                           |                           |
| Technical and scientific work etc.        | 178 (10.7)                | 223 (13.4)                |
| Social and healthcare services            | 492 (29.6)                | 402 (24.2)                |
| Administration and office work            | 281 (16.9)                | 230 (13.9)                |
| Commercial work                           | 112 (6.7)                 | 137 (8.3)                 |
| Agriculture and forestry                  | 490 (3.0)                 | 71 (4.3)                  |
| Transport                                 | 58 (3.5)                  | 79 (4.8)                  |
| Industrial and construction work, mining  | 300 (18.3)                | 301 (18.1)                |
| Service work                              | 190 (11.4)                | 217 (13.1)                |
| <b>Insurance district (%)</b>             |                           |                           |
| Northern                                  | 206 (12.4)                | 234 (14.1)                |
| Western                                   | 253 (15.2)                | 221 (13.3)                |
| Eastern                                   | 188 (11.3)                | 258 (15.5)                |
| South-Western                             | 392 (23.6)                | 347 (20.9)                |
| Southern                                  | 621 (37.4)                | 600 (36.1)                |
| <b>Number of unemployment days, T1</b>    |                           |                           |
| Mean (95% CI)                             | 2.8 (1.8 to 3.8)          | 3.6 (2.5 to 4.6)          |
| <b>Number of full sick leave days, T1</b> |                           |                           |
| Mean (95% CI)                             | 17.0 (15.3 to 18.7)       | 17.9 (16.0 to 19.9)       |
| <b>Number of rehabilitation days, T1</b>  |                           |                           |
| Mean (95% CI)                             | 1.7 (0.9 to 2.5)          | 1.6 (0.8 to 2.4)          |
| <b>Work participation, T1</b>             |                           |                           |
| Mean (95% CI)                             | 94.1 (93.6 to 94.7)       | 93.7 (93.0 to 94.3)       |

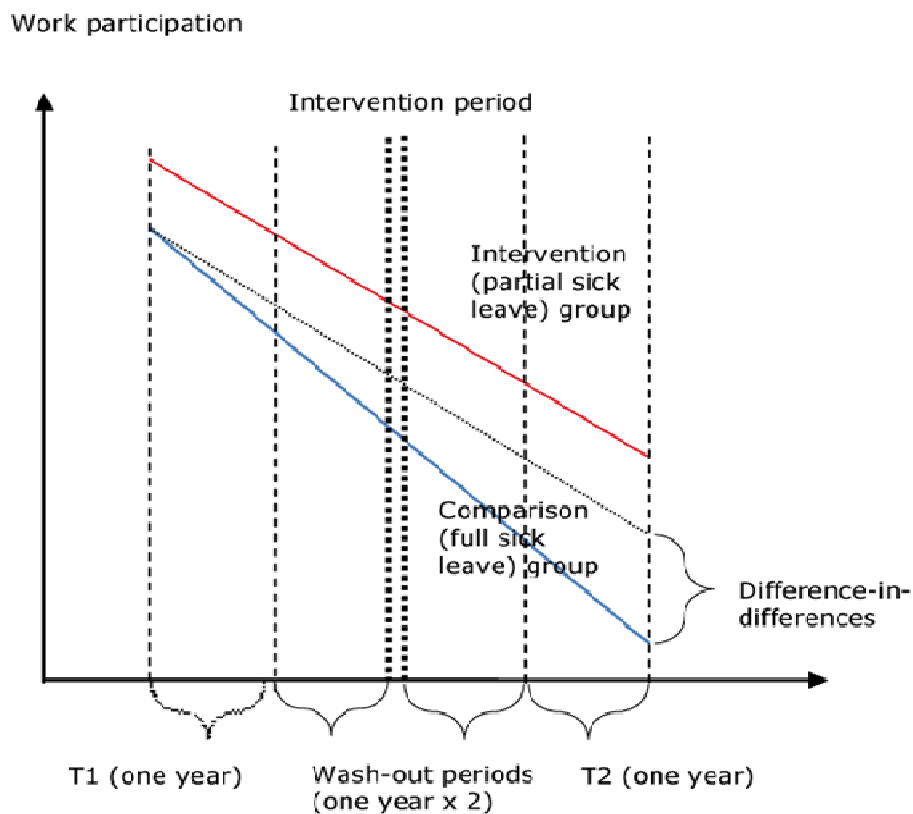

Figure. Schematic presentation of the study design and difference-in-differences method. (T1 corresponds to pre-intervention period, T2 corresponds to post-intervention period).

# BMJ Open

## Effectiveness of introduction of new legislation of partial sickness benefit on work participation: A quasi-experiment in Finland

|                                 |                                                                                                                                                                                                                                                                                                                                            |
|---------------------------------|--------------------------------------------------------------------------------------------------------------------------------------------------------------------------------------------------------------------------------------------------------------------------------------------------------------------------------------------|
| Journal:                        | <i>BMJ Open</i>                                                                                                                                                                                                                                                                                                                            |
| Manuscript ID:                  | bmjopen-2014-006685.R1                                                                                                                                                                                                                                                                                                                     |
| Article Type:                   | Research                                                                                                                                                                                                                                                                                                                                   |
| Date Submitted by the Author:   | 18-Nov-2014                                                                                                                                                                                                                                                                                                                                |
| Complete List of Authors:       | Kausto, Johanna; Finnish Institute of Occupational Health, Viikari-Juntura, Eira; Finnish Institute of Occupational Health, Virta, Lauri; Social Insurance Institution, Gould, Raija; Finnish Centre for Pensions, Koskinen, Aki; Finnish Institute of Occupational Health, Solovieva, Svetlana; Finnish Institute of Occupational Health, |
| <b>Primary Subject Heading</b>: | Public health                                                                                                                                                                                                                                                                                                                              |
| Secondary Subject Heading:      | Epidemiology                                                                                                                                                                                                                                                                                                                               |
| Keywords:                       | partial sick leave, sick leave, work disability, population registers                                                                                                                                                                                                                                                                      |
|                                 |                                                                                                                                                                                                                                                                                                                                            |

SCHOLARONE™  
Manuscripts

1  
2  
3  
4  
5  
6  
7  
8  
9  
10  
11  
12  
13  
14  
15  
16  
17  
18  
19  
20  
21  
22  
23  
24  
25  
26  
27  
28  
29  
30  
31  
32  
33  
34  
35  
36  
37  
38  
39  
40  
41  
42  
43  
44  
45  
46  
47  
48  
49  
50  
51  
52  
53  
54  
55  
56  
57  
58  
59  
60

1 **EFFECTIVENESS OF INTRODUCTION OF NEW LEGISLATION OF**  
2 **PARTIAL SICKNESS BENEFIT ON WORK PARTICIPATION: A QUASI-**  
3 **EXPERIMENT IN FINLAND**

9 Johanna Kausto<sup>1</sup>, Eira Viikari-Juntura<sup>1</sup>, Lauri J Virta<sup>2</sup>, Raija Gould<sup>3</sup>, Aki Koskinen<sup>1</sup>, Svetlana  
10 Solovieva<sup>1</sup>

11  
12  
13 <sup>1</sup> Finnish Institute of Occupational Health, Helsinki, Finland

14 <sup>2</sup> The Social Insurance Institution of Finland (SII), Turku, Finland

15 <sup>3</sup> Finnish Centre for Pensions, Helsinki, Finland

16  
17  
18 [johanna.kausto@ttl.fi](mailto:johanna.kausto@ttl.fi)

19 [eira.viikari-juntura@ttl.fi](mailto:eira.viikari-juntura@ttl.fi)

20 [lauri.virta@kela.fi](mailto:lauri.virta@kela.fi)

21 [raija.gould@etk.fi](mailto:raija.gould@etk.fi)

22 [aki.koskinen@ttl.fi](mailto:aki.koskinen@ttl.fi)

23 [svetlana.solovieva@ttl.fi](mailto:svetlana.solovieva@ttl.fi)

24  
25  
26 **Corresponding author:**

27  
28 Johanna Kausto, Topeliuksenkatu 41 aA,

29 00250 Helsinki, Finland

30 Tel.: +358 30 474 2509

31 E-mail: [johanna.kausto@ttl.fi](mailto:johanna.kausto@ttl.fi)

32  
33  
34  
35 Word count: 4165

36 Number of tables: 3

37 Number of figures: 1

1  
2  
3  
4  
5  
6  
7  
8  
9  
10  
11  
12  
13  
14  
15  
16  
17  
18  
19  
20  
21  
22  
23  
24  
25  
26  
27  
28  
29  
30  
31  
32  
33  
34  
35  
36  
37  
38  
39  
40  
41  
42  
43  
44  
45  
46  
47  
48  
49  
50  
51  
52  
53  
54  
55  
56  
57  
58  
59  
60

## 42 Abstract

43  
44 **Objectives** To examine the effect of new legislation on partial sickness benefit on subsequent  
45 work participation of Finns with long-term sickness absence. Additionally, we investigated  
46 whether the effect differed by sex, age, or diagnostic category.

47 **Design** A register-based quasi-experimental study compared the intervention (partial sick  
48 leave) group with the comparison (full sick leave) group regarding their pre-post differences in  
49 the outcome. The pre-intervention and post-intervention-period each consisted of 365 days.

50 **Setting** Nationwide, individual-level data on the beneficiaries of partial or full sickness benefit  
51 in 2008 were obtained from national sickness insurance, pension and earnings registers.

52 **Participants** 1738 persons in the intervention and 56754 persons in the comparison group.

53 **Outcome** Work participation, measured as the proportion (%) of time within 365 days when  
54 participants were gainfully employed and did not receive either partial or full ill-health-related  
55 or unemployment benefits.

56 **Results** Although work participation declined in both groups, the decline was 5% (absolute  
57 difference-in-differences) smaller in the intervention than in the comparison group, with a  
58 minor sex difference. The beneficial effect of partial sick leave was seen especially among  
59 those aged 45 to 54 (5%) and 55 to 65 (6%) and in mental disorders (13%). When the groups  
60 were rendered more exchangeable (propensity score-matching on age, sex, diagnostic  
61 category, income, occupation, insurance district, work participation, sickness absence,  
62 rehabilitation periods and unemployment prior to intervention and their interaction terms), the  
63 effects on work participation were doubled and seen in all age groups and in other diagnostic  
64 categories than traumas.

65 **Conclusions** The results suggest that the new legislation has potential to increase work  
66 participation of the population with long-term sickness absence in Finland. If applied in a larger  
67 scale, partial sick leave may turn out to be a useful tool in reducing withdrawal of workers  
68 from the labor market due to health reasons.

69  
70  
71

**Article Summary**

Strengths and limitations of the study:

- Applying nationally representative population register-based data with valid information on the payment of health- and unemployment-related allowances in Finland.
- Applying a quasi-experimental study-design with difference-in differences and propensity score analysis to control for selection on both observed and unobserved factors.
- Registers provided only a limited number of background characteristics.

## 87 Introduction

88

89 The need to increase work participation of working age people is currently a matter of concern  
90 in many Western countries. In Finland, delayed or lacking labor market attachment of young  
91 people, absence from work during later years and early exit from labor market have all raised  
92 alarm. To counteract these trends, an active labor market policy has been adopted, including  
93 the introduction of partial social security benefits and other tools to increase the so called  
94 flexicurity of the labor market [1]. In Finland, legislation on partial sickness benefit was  
95 introduced in 2007. The new benefit allowed for the first time to combine part-time sick-leave  
96 with part-time work.

97

98 The Finnish social insurance is based on the Nordic Model. Everyone who is aged from 16 to  
99 67, non-retired and living permanently in the country (employees, self-employed, students,  
100 unemployed job seekers and those on sabbatical or alternation leave) and also nonresidents  
101 working for at least four months in Finland are covered by statutory sickness insurance. The  
102 sickness allowances are financed by employers, employees and the state and they are  
103 administrated by the Social Insurance Institution of Finland (SII). Statutory benefits can rest  
104 on previous earnings or benefits or the minimum allowance can be granted. For the earnings-  
105 related occupational sickness benefits, a minimum of three months of employment is required.

106

107 At present, the Finnish national sickness benefit scheme includes a full and a partial sickness  
108 benefit. A medical certificate is an absolute requirement for the two sickness benefits to be  
109 granted. In order to be eligible for the partial benefit an employee has to be eligible for a full  
110 benefit as well, but according to medical judgment partial return to work is safe enough.

111 Partial sick leave is thus alternative to full sick leave and it is always medically certified. During  
112 the first years after introducing the partial sickness benefit in Finland, a partial sick leave had  
113 to be directly preceded by a period of full sick leave of at least 60 days and the partial sickness  
114 benefit could be granted from a minimum of 12 to a maximum of 72 working days. During  
115 partial sick leave, work time and salary are reduced by 40 – 60% of the regular work hours  
116 and work tasks can be modified if necessary. The employee and the employer sign a fixed term

1  
2 117  
3  
4 118 work contract for the part-time work. In Finland, the use of partial sick leave is voluntary for  
5  
6 119 the individual. The employer, as well, is entitled to decline the use of the benefit in case the  
7  
8 120 work arrangements needed at the work place are not feasible.  
9  
10 121  
11 122 Sickness absence rates are in many countries higher among women compared with men [2].  
12  
13 123 Also partial sick leave has been more frequently used by women [3]. It is known that sickness  
14  
15 124 absence increases with age [2]. It is also recognized that challenges of return to work are  
16  
17 125 different for example in musculoskeletal diseases and mental disorders. In the latter category,  
18  
19 126 the outflow from disability benefits due to recovery has been lower [4].  
20  
21 127  
22  
23 128 The current evidence on the effects of partial sick leave on return to work or work participation  
24  
25 129 is partly inconsistent. In the other Nordic countries, partial sick leave has been found to  
26  
27 130 increase the likelihood of return to regular working hours [5, 6] and to be associated with  
28  
29 131 higher subsequent employment rate [7]. No effect of active sick leave (return to work to  
30  
31 132 modified duties) on the average number of sick leave days or long-term disability was detected  
32  
33 133 in a Norwegian cluster randomized controlled trial [8]. There is some discrepancy in the  
34  
35 134 findings on the effectiveness of partial sick leave in mental disorders. A Danish study [9] found  
36  
37 135 no effect, whereas a Swedish study [10] reported a weak effect of partial sick leave on full  
38  
39 136 recovery in the beginning of work disability due to mental disorders and a stronger effect when  
40  
41 137 partial sick leave was assigned after 60 days of full sick leave.  
42  
43 138  
44  
45 139 In a randomized controlled trial among persons with musculoskeletal disorders we found that  
46  
47 140 early part-time sick leave predicted faster sustained return to work than full sick leave [11].  
48  
49 141 The beneficial effect of partial sick leave on work retention was also observed at population  
50  
51 142 level [12, 13]. Partial sick leave was associated in the short term with decreased work  
52  
53 143 retention, in terms of increased subsequent sickness absence. In the long-term it was  
54  
55 144 associated with increased work retention, in terms of increased subsequent use of partial  
56  
57 145 disability pension and decreased use of full disability pension. These findings imply the  
58  
59 146 necessity to use an outcome that simultaneously accounts for different indicators of work  
60



1  
2 147 participation. Some of these previous observational studies have suffered from limited data  
3  
4 148 samples and narrow generalizability of findings [5, 9], self-reported data [9], and  
5  
6 149 incomprehensive operationalization and measurement of work participation [5, 6, 10, 12, 13].

7  
8 150

9  
10 151 In order for policy makers to be able to make well informed decisions in the area of social and  
11  
12 152 health policies, scientific evaluation of the effectiveness of population level interventions, e.g.  
13  
14 153 introducing new legislation or policy change is needed [14]. Natural or quasi-experiments  
15  
16 154 have successfully been used in connection with various population level interventions in the  
17  
18 155 field of public health when planned experimentation, i.e. manipulation of exposure, has not  
19  
20 156 been possible [15]. In the field of work disability research, this approach has, however been  
21  
22 157 rare [2].

23  
24 158

25  
26 159 This study examined the effects of the new Finnish legislation that enabled the use of partial  
27  
28 160 sickness benefit on subsequent work participation. For this we compared beneficiaries of partial  
29  
30 161 sickness benefit with those receiving full sickness benefit a year after the law on partial sick  
31  
32 162 leave was enacted. We utilized a quasi-experimental design with an integrated measure of  
33  
34 163 work participation. Analyses were carried out in an individual-level register-based data  
35  
36 164 representative of the Finnish working population with long-term sickness absence. We  
37  
38 165 examined whether the effects of partial sick leave on subsequent work participation differed by  
39  
40 166 sex, age, or diagnostic category of the benefit receivers.

41  
42 167

43  
44 168

## 45 169 **Methods**

46  
47 170

### 48 49 171 *Study design and setting*

50  
51 172 The population level intervention of interest in this study was the introduction of partial sick  
52  
53 173 leave in Finland in 2007. We conducted a quasi-experimental study following recent guidelines  
54  
55 174 on evaluating population health interventions [15]. This design was chosen to minimize the  
56  
57 175 effect of both measured and unmeasured confounding. We compared the intervention (partial  
58  
59 176 sick leave) group with the comparison (full sick leave) group regarding their pre-post  
60

1  
2 177 differences in work participation. The pre-intervention (T1) and post-intervention (T2) study  
3  
4 178 period each consisted of 365 days. A wash-out-period of one year was set pre and post  
5  
6 179 intervention (Figure 1) in order to obtain a robust effect of the intervention on work  
7  
8 180 participation. These time-windows were allowed to move according to the timing of the  
9  
10 181 individual's sick leave period.

11 182

13 183 <Figure 1>

15 184

17 185 Individual-level data were derived from the national sickness insurance register of the SII and  
18 186 the pension and earnings registers of the Finnish Centre for Pensions. Data from these three  
19 187 registers were linked on the basis of social security numbers of the participants. The social  
20 188 insurance register provided information on all medically certified and compensated sickness  
21 189 absence spells, temporary and permanent national disability pensions, and old age pensions in  
22 190 Finland. The registers of the Finnish Centre for Pensions contained information on employment  
23 191 periods, earnings-related pensions and unsalaried periods due to disability, rehabilitation or  
24 192 unemployment. Written consent from the individuals was not needed as only encrypted  
25 193 register data were obtained by the researchers carrying out the analyses in the Finnish  
26 194 Institute of Occupational Health.

27 195

### 29 196 *Participants*

31 197 Participants that were granted a partial sickness benefit (intervention group) were compared  
32 198 with those who received a full sickness benefit (comparison group). A total sample of  
33 199 individuals who had received either partial sickness benefit (n = 1 838) or full sickness benefit  
34 200 (n = 67 086) in 2007 - 2008 and whose compensated sickness absence period had ended  
35 201 between 1 January and 31 December 2008 was drawn from the national sickness insurance  
36 202 register. Since a full time sickness absence of 60 working days had to precede partial sick  
37 203 leave, only those with full sick leave ending with an uninterrupted period of at least 60 days of  
38 204 payment of the benefit were included in the total sample. Thus, in our sample, receivers of full  
39 205 sickness benefit had not received partial sickness benefit, but they would have been entitled to  
40 206 it as for the length of the preceding full time sickness absence.

1  
2 207 Since eligibility for a partial sickness benefit required a prior work contract, we excluded from  
3  
4 208 the analyses those who did not have any employment periods (n=2 and n=4 923) during the  
5  
6 209 entire study period. We additionally excluded those who had died (n=24 in the partial sick  
7  
8 210 leave group and n=2 600 in the full sick leave group) or moved to old age pension (n=1 and  
9  
10 211 n=354, respectively), had not turned 16 at the time of the first data collection period (T1)  
11  
12 212 (n=3) or whose sickness absence periods (ending in 2008) extended beyond the time-frame of  
13  
14 213 data collection (n=66 and n=1 024). The final sample included 1 738 participants in the partial  
15  
16 214 sick leave group and 56 754 participants in the full sick leave group. We focused our analyses  
17  
18 215 in the four main diagnostic groups in which partial sickness benefit has most frequently been  
19  
20 216 used, i.e. musculoskeletal diseases, mental disorders, traumas and tumors (M, F, S and T, and  
21  
22 217 C and D-categories in ICD-10, respectively). All other diagnoses were merged in one group.

23  
24  
25 218

#### 26 219 *Outcome measure*

27  
28 220 Work participation was operationalized as the time the individuals were likely to have actually  
29  
30 221 participated in gainful employment. It was approximated as the proportion (%) of time within  
31  
32 222 365 days when participants had an employment contract and did not receive either partial or  
33  
34 223 full ill-health-related benefits (sickness benefits, rehabilitation allowances, disability pensions)  
35  
36 224 or unemployment benefits. Work participation was calculated for T1 and T2. It was assumed  
37  
38 225 that when receiving partial benefits, the participants worked half of the work time (which is  
39  
40 226 typically the case in Finland).

41  
42 227

#### 43 228 *Covariates*

44  
45  
46 229 Data on sex, dates of birth and death, insurance district (region), annual gross income in  
47  
48 230 2007, diagnostic codes (ICD-10), and occupational branch were obtained from the sickness  
49  
50 231 insurance register. Information on occupation was available for all participants in the  
51  
52 232 intervention group and for a random sample of 7.7% of the participants in the comparison  
53  
54 233 group.

55  
56 234  
57  
58  
59  
60

235 *Data analyses*

236 The distributions of all variables were compared between the total full sickness benefit group  
237 (n = 67 086) and the subsample of those participants in the full sickness benefit group for  
238 whom the registers provided information on occupational branch (n = 4 347). Since no  
239 differences in the distributions were detected, we assumed that information on occupational  
240 branch was missing at random. Multiple imputation was used to compensate for the missing  
241 data on occupational branch in the comparison group. For this, we generated multiple imputed  
242 data sets (n=10) using the *proc mi* of SAS. The imputation model included all covariates.  
243  
244 Propensity score with 1:1 matching was used to match individuals on the probability that they  
245 would belong to the intervention (partial sick leave) group. Individuals that were matched to  
246 each other had equal or nearly equal (close enough) estimated propensity scores.

247

248 Difference-in differences- (DID-) and propensity score- (PS-) analyses are methods that are  
249 complementary to each other and can be applied in causal inference to counter selection bias  
250 and confounding [16]. We applied the DID method alone and in combination with PS-  
251 matching. Combining methods to counter bias and confounding from different sources and  
252 comparing the results has been encouraged [15]. The DID-method can be applied to control  
253 for fixed unobserved individual differences and common trends.

254

255 The DID-method allows one to estimate the difference in pre-post, within subject, differences  
256 between the intervention and the comparison group. The effect of partial sick leave on work  
257 participation was consequently estimated as the difference in pre-post-differences (differences  
258 between T2 and T1) between partial and full sick leave groups. The effect was estimated using  
259 general linear model with repeated measures design. F-statistic for the interaction term  
260 between the group assignment and change of work participation in time was applied as the  
261 difference-in-differences statistic.

262

263 Propensity score is defined as conditional probability of being exposed to a certain intervention  
264 given observed covariates [15, 17, 18]. It is applied to balance the covariates in two groups

1  
2 265 and thus to reduce bias. We computed PS (i.e. probability of being exposed to partial sick  
3  
4 266 leave) by logistic regression for all participants. The following set of variables and their  
5  
6 267 interaction terms were included in the logistic regression model: age, sex, diagnostic category,  
7  
8 268 income, occupation, insurance district, and work participation, sickness absence, rehabilitation  
9  
10 269 periods and unemployment at T1. The best fit model was chosen.

11  
12 270

13 271 Thereafter we matched the partial sick leave and full sick leave groups on the estimated  
14  
15 272 propensity score using local optimal (greedy) algorithm [19]. The matching was performed  
16  
17 273 within (sex x diagnostic category)-strata. Subsequently DID-analysis was also carried out in  
18  
19 274 the matched subsample.

20  
21 275

22  
23 276 Several sensitivity analyses were carried out. The analyses were run separately for participants  
24  
25 277 for whom the registers provided information on occupational branch and for the total sample in  
26  
27 278 which imputed data on occupational branch were utilized for the comparison group. To  
28  
29 279 examine the group difference in work participation at T1 (due to unemployment or sick leave)  
30  
31 280 as source of reduced group comparability, the analyses were carried out separately among  
32  
33 281 participants who did not receive unemployment benefits at T1 and among participants with  
34  
35 282 100% of work participation at T1.

36  
37 283

38  
39 284

## 40 41 285 **Results**

### 42 43 44 286 *Descriptive characteristics of the study population*

45  
46 287 Information on the background characteristics of the intervention and comparison group in the  
47  
48 288 total analysed sample is shown in Table 1. Women constituted 71% of the partial sick leave  
49  
50 289 group and 53% of the full sick leave group. The partial benefit was most common among those  
51  
52 290 who were aged between 35 and 54, whereas the full benefit among those aged from 45 to 65.  
53  
54 291 The income level of those in the partial sick leave group was higher than of those in the full  
55  
56 292 sick leave group. The partial sickness benefit was most often used in connection with mental  
57  
58 293 disorders and musculoskeletal diseases, while the full benefit was most often used in  
59  
60

1  
2 294 musculoskeletal diseases. The use of the partial benefit was most frequent in social and  
3  
4 295 healthcare services and administrative and office work, whereas the full benefit was most  
5  
6 296 commonly used in industrial and service work. No large regional differences in the use of the  
7  
8 297 benefits were detected.

9 298

10  
11 299 <Table 1>

12  
13 300

14  
15 301 *Difference-in-differences in work participation between partial and full sick leave group*

16  
17 302

18  
19 303 In both groups the level of work participation decreased during the follow up, the absolute  
20  
21 304 reduction being larger in the full sick leave group (-26.5%) compared with the partial sick  
22  
23 305 leave group (-21.2%) (Table 2). The absolute overall difference-in-differences in work  
24  
25 306 participation was 5.3% (95% CI 3.1% to 7.5%).

26  
27 307

28  
29 308 The difference-in-differences in work participation tended to be larger in men than in women.

30  
31 309 In all age categories, work participation declined more in the full than in the partial sick leave

32  
33 310 group. The difference in the decline was significant in age-categories 45-54 and 55-65. There

34  
35 311 was no effect in those aged 35-44. In the youngest age category (16-34 years) the difference-

36  
37 312 in-differences was large but statistically non-significant.

38  
39 313

40  
41 314 A statistically significantly larger effect (12.8% 95% CI 9.0% to 16.5%) was found in mental

42  
43 315 disorders compared with the other diagnostic categories.

44  
45 316

46  
47 317 <Table 2>

48  
49 318

50  
51 319 The results found in the subsample of participants for whom the registers provided information

52  
53 320 on occupational branch were very similar to those in the total sample (data not shown). The

54  
55 321 exclusion of the participants who received unemployment benefits at T1 led to an absolute

56  
57 322 increase in the difference-in-differences in work participation (DID 7.6%, 95% CI 5.4% to

58  
59 323 9.7%). The difference-in- differences in work participation increased further (DID 9.5%, 95%

60

1  
2 324 CI 6.8% to 12.1%) when participants with reduced work participation (for any reason) at T1  
3  
4 325 were excluded from the analyses.

5 326

6 327

8 328 *Difference-in-differences in work participation in the propensity score-matched subsample*

9 329

11 330 The matching procedure resulted in a total of 1 660 matched pairs of participants. The

13 331 propensity score matched partial sickness benefit receivers did not differ from full sickness

15 332 benefit receivers with regard to age, gross income, number of unemployment days, sickness

17 333 absence days, rehabilitation days or work participation at T1. There were some differences

19 334 between the groups in the distribution of occupational branches and insurance districts

21 335 (Appendix Table 1).

23 336

25 337 The results from the DID-analysis in the PS-matched subsample are presented in Table 3. The

27 338 absolute overall difference-in-differences was increased to 9.8% (95% CI 5.9 to 13.7). A

29 339 tendency for a larger DID in men than in women was also found in this subsample. The DID

31 340 was still largest in those participants aged over 45 years, but in contrast to the total sample an

33 341 effect was seen in the younger age categories as well. Differences between the diagnostic

35 342 categories were reduced as compared to the total sample. The largest effect was still found in

37 343 mental disorders. In addition, a statistically significant DID was also found in musculoskeletal

39 344 diseases and tumours. Further adjustment for the differences in the distribution of occupation

41 345 and insurance district between the intervention and comparison group, had no effect on the

43 346 results of the DID-analysis.

45 347

47 348

49 349 < Table 3 >

51 350

53 351

55

56

57

58

59

60

1  
2 352 **Discussion**

3  
4  
5 353 *Principal findings*

6  
7 354 We applied a quasi-experimental design to study the population level effects of the  
8  
9 355 introduction of partial sickness benefit in Finland among a working population with long-term  
10  
11 356 sickness absence. It was found that partial sick leave had a positive effect on work  
12  
13 357 participation. Although the overall work participation declined from T1 to T2, at the population  
14  
15 358 level the decline was 5% (absolute difference) smaller among the receivers of partial sickness  
16  
17 359 benefit (intervention group) than among the receivers of full sickness benefit (comparison  
18  
19 360 group). The beneficial effect of partial sick leave was seen especially among those aged from  
20  
21 361 45 to 54 and 55 to 65 and in mental disorders. No major sex difference was detected. When  
22  
23 362 the groups were rendered more exchangeable, the effect on work participation was doubled,  
24  
25 363 and effects were seen in other diagnostic categories than traumas and all age groups.  
26

27 364

28  
29 365

30  
31 366 *Validity of the study*

32  
33 367

34  
35 368 An observational quasi-experimental study design can be applied to assess the effects of a  
36  
37 369 planned event or intervention, when randomized controlled trials are not ethical or feasible.  
38  
39 370 Observational studies can also better simulate real-world settings and offer more relevant  
40  
41 371 information in view of policy-making [20]. The internal validity of observational studies is lower  
42  
43 372 than that of randomized controlled trials due to possible selection according to exposure. For  
44  
45 373 this reason, an analytical approach called potential outcomes or counterfactual framework was  
46  
47 374 chosen. The term refers to the fact that in an ideal situation the exposed would be compared  
48  
49 375 to themselves when unexposed. Since this comparison is impossible, we need a comparable or  
50  
51 376 exchangeable comparison group. We utilized two methods (DID and PS) that have been  
52  
53 377 previously recommended and applied to control for selection on both observed factors and  
54  
55 378 unobserved fixed factors [15, 20, 21].

56  
57 379  
58  
59  
60



1  
2 380 In the DID- method, it is assumed that the unobserved characteristics in the studied groups  
3  
4 381 are stable and that the outcomes would change identically in these groups in the absence of  
5  
6 382 intervention. Consequently, the intervention and comparison groups should be identical,  
7  
8 383 except for the intervention status. However, it is sufficient that the groups are closely, though  
9  
10 384 not exactly, similar [15]. We included in the comparison group only participants who would  
11  
12 385 have been entitled to partial sickness benefit as for the length of the preceding sickness  
13  
14 386 absence. We also applied a short wash-out period, to minimize the intragroup differences  
15  
16 387 between the two time points. However, as full information on the eligibility of the participants  
17  
18 388 for partial sickness benefit was not available in the registers (e.g. severity of the health  
19  
20 389 problem and degree of remaining workability), we utilized matching on PS to further increase  
21  
22 390 the exchangeability of the groups. Moreover, at the time of the study, the national rates in  
23  
24 391 sickness absence were rather stable. The unemployment rate in Finland was relatively low  
25  
26 392 during the intervention in 2008 (6.4%), however the rates were similar at T1 (7.7%-8.4%)  
27  
28 393 and T2 (7.8%-8.4%).

29 394

30  
31 395 We utilized nationwide population data with comprehensive individual-level register-based  
32  
33 396 information on ill-health- and unemployment-related absences from work. Personal  
34  
35 397 identification (social security) numbers enabled linking information from three separate source  
36  
37 398 registers. These registers have originally been established for administrative purposes, but the  
38  
39 399 data can also be used for research [22]. Among the advantages of register-based studies is a  
40  
41 400 low likelihood of selection and attrition bias. The source registers of this study provided valid  
42  
43 401 information on the receivers and payment days of the benefits. A weakness of the registers is  
44  
45 402 that they typically provide only a limited number of background characteristics of the  
46  
47 403 participants and other covariates. The process of assignment to partial sick leave is not  
48  
49 404 random. Most likely it is complex and it is affected by many actors (the patient, physician,  
50  
51 405 employer, and workplace) for which information cannot be found in the national registers.  
52  
53 406 Nevertheless, the factors that were included in the analyses have earlier been found to be  
54  
55 407 important predictors of the use of health-related social security benefits and also associated  
56  
57 408 with work disability and return to work.

58  
59 409  
60

1  
2 410 Information on diagnoses for sickness benefits was as well retrieved from registers and was  
3  
4 411 based on medical assessment. In case of a long-term sickness absence (lasting more than 60  
5  
6 412 days) in Finland, the sickness benefit is paid in shorter periods, each being covered with a  
7  
8 413 separate medical certificate. Diagnostic codes are transferred from these certificates to the  
9  
10 414 administrative registers. We used the latest (and presumably the most accurate) diagnostic  
11  
12 415 code provided for each long-term sickness absence in 2007-2008. Data on occupational branch  
13  
14 416 had to be imputed for the majority of participants in the comparison group. Nevertheless, the  
15  
16 417 sensitivity analyses suggested that using imputed data on occupation did not affect the results.  
17  
18 418 In contrast to earlier studies on the topic, work participation was approximated in the current  
19  
20 419 study by taking simultaneously into account the rate of different ill-health- and  
21  
22 420 unemployment-related benefits. We operationalized work participation as proportion of time  
23  
24 421 within a year not receiving ill-health related or unemployment benefits. Hence we had a  
25  
26 422 relatively comprehensive indicator of the availability of the participants for the labour market.

27 423

28  
29 42430  
31 425 *Results in relation to earlier findings*32  
33 426

34  
35 427 The overall results of this study are congruent with earlier findings, indicating positive effects  
36  
37 428 of partial sick leave on return to work and work retention [5-7, 12]. We found that partial sick  
38  
39 429 leave had a positive effect on future work participation especially in mental disorders, but the  
40  
41 430 results of the analyses in the subgroup suggested that the overall effect in the total sample  
42  
43 431 might be underestimated.

44  
45 432

46  
47 433 Our findings on the usefulness of partial sick leave in mental disorders, though not directly  
48  
49 434 comparable, are congruent with a study showing beneficial effects of partial sick leave on RTW  
50  
51 435 in mental disorders after 60 days of full sick leave [10], but differ from an earlier study  
52  
53 436 reporting no effect [9]. The literature suggests that returning and continuing at work may be  
54  
55 437 more challenging for those with mental disorders than with somatic problems (e.g.  
56  
57 438 musculoskeletal diseases) [23-25]. In addition, the outflow from disability benefits due to  
58  
59 439 recovery has been lower among those with mental disorders than with musculoskeletal

1  
2 440 diseases [4]. However, in our previous study we found an effect of partial sick leave on work  
3  
4 441 disability pension in both diagnostic categories, the effect tending to be larger in mental  
5  
6 442 disorders than in musculoskeletal diseases [12]. The diagnostic groups of musculoskeletal  
7  
8 443 diseases and mental disorders may differ in the degree of comparability of the partial and full  
9  
10 444 sick leave groups with regard to the background characteristics, severity of the health problem  
11  
12 445 and remaining work ability, number of sickness absences as well as in transition to  
13  
14 446 rehabilitation and unemployment. When the exchangeability of the groups was increased with  
15  
16 447 propensity score matching, a beneficial effect on work participation was detected also in  
17  
18 448 persons with musculoskeletal diseases and those with tumours.

19 449  
20  
21 450 Sickness absence is known to increase with age [26]. In addition, it has been found that return  
22  
23 451 to work after long-term sickness absence is less likely at higher ages [27, 28]. Partial sick  
24  
25 452 leave was found to be most frequently used and also most effective among middle-aged and  
26  
27 453 older workers. It may well be that work arrangements associated with partial sick leave are  
28  
29 454 more easily implemented by employees in a more established or stable work situation.

30 455

31 456

## 32 457 **Conclusions**

33 458

34  
35  
36  
37  
38  
39 459 The overall results of the effectiveness of partial sick leave on work participation suggest that  
40  
41 460 the new legislation on partial sickness benefit introduced in 2007 has potential to increase  
42  
43 461 work participation of the working population with long-term sickness absence in Finland. A  
44  
45 462 positive effect was seen especially in mental disorders. In the future – if applied in a larger  
46  
47 463 scale – partial sick leave may turn out to be an effective tool in reducing temporary and  
48  
49 464 permanent withdrawal of workers from the labour market due to health reasons.

50 465

51 466

52 467

53 468

54 469

55 470

56 471

57 472

1  
2 470 **Contributors:** JK, SS, EVJ, LJV and AK designed the study. All authors were involved in data  
3  
4 471 collection. JK, SS and AK conducted the analyses, all contributed to the interpretation of the  
5  
6 472 results and JK, SS and EVJ drafted the manuscript. All authors accepted the final version of the  
7  
8 473 manuscript.

9 474

11 475 **Funding:** The study received financial support from the Social Insurance Institution of Finland  
12  
13 476 (grant no: 67/26/2011)

14 477

17 478 **Competing interests:** Authors declare having no competing interests.

18 479

21 480 **Ethical approval:** Ethical approval was not necessary as only encrypted data were analysed.

22 481

25 482 **Data sharing:** No additional data available.

26 483

#### 29 484 **Figure legend**

31 485 Figure 1. Schematic presentation of the study design and difference-in-differences method. (T1  
32  
33 486 corresponds to pre-intervention period, T2 corresponds to post-intervention period).

34 487

35 488

36 489

37 490

38 491

39 492

40 493

41 494

42 495

43 496

44 497

45 498

46 499

47 500

1  
2 5003  
4 5015  
6 502 **References**

- 7 503 1. Philips , E.R., Alloja J, Krillo K, Lauringson A, *Approaches to flexicurity: EU-models*. 2007,  
8 504 European foundation for the improvement of living and working conditions.
- 9 505 2. OECD, *Sickness, Disability and Work: Breaking the Barriers: A Synthesis of Findings across OECD*  
10 506 *countries*, OECD Publishing. 2010.
- 11 507 3. Kausto, J., et al., *Partial sick leave--review of its use, effects and feasibility in the Nordic*  
12 508 *countries*. Scand J Work Environ Health, 2008. **34**(4): p. 239-49.
- 13 509 4. OECD, *Sick on the job? Myths and Realities about Mental Health and Work*, in *Mental health and*  
14 510 *Work*,. 2012, OECD Publishing.
- 15 511 5. Andren, D. and M. Svensson, *Part-time sick leave as a treatment method for individuals with*  
16 512 *musculoskeletal disorders*. Journal of occupational rehabilitation, 2012. **22**(3): p. 418-26.
- 17 513 6. Hogelund, J., A. Holm, and J. McIntosh, *Does graded return-to-work improve sick-listed workers'*  
18 514 *chance of returning to regular working hours?* Journal of health economics, 2010. **29**(1): p. 158-  
19 515 69.
- 20 516 7. Markussen, S., A. Mykletun, and K. Roed, *The case for presenteeism - Evidence from Norway's*  
21 517 *sickness insurance program*. Journal of Public Economics, 2012. **96**(11-12): p. 959-972.
- 22 518 8. Scheel, I.B., et al., *Blind faith? The effects of promoting active sick leave for back pain patients: a*  
23 519 *cluster-randomized controlled trial*. Spine (Phila Pa 1976), 2002. **27**(23): p. 2734-40.
- 24 520 9. Hogelund, J., A. Holm, and L.F. Eplöv, *The effect of part-time sick leave for employees with*  
25 521 *mental disorders*. The journal of mental health policy and economics, 2012. **15**(4): p. 157-70.
- 26 522 10. Andren, D., *Does part-time sick leave help individuals with mental disorders recover lost work*  
27 523 *capacity?* J Occup Rehabil, 2014. **24**(2): p. 344-60.
- 28 524 11. Viikari-Juntura, E., et al., *Return to work after early part-time sick leave due to musculoskeletal*  
29 525 *disorders: a randomized controlled trial*. Scandinavian journal of work, environment & health,  
30 526 2012. **38**(2): p. 134-43.
- 31 527 12. Kausto, J., et al., *Partial sick leave associated with disability pension: propensity score approach*  
32 528 *in a register-based cohort study*. BMJ open, 2012. **2**(6).
- 33 529 13. Kausto, J., et al., *Associations between partial sickness benefit and disability pensions: initial*  
34 530 *findings of a Finnish nationwide register study*. BMC Public Health, 2010. **10**: p. 361.
- 35 531 14. Grimshaw, J., et al., *Experimental and quasi-experimental designs for evaluating guideline*  
36 532 *implementation strategies*. Family practice, 2000. **17 Suppl 1**: p. S11-6.
- 37 533 15. Craig, P., et al., *Using natural experiments to evaluate population health interventions: new*  
38 534 *Medical Research Council guidance*. Journal of Epidemiology and Community Health, 2012.  
39 535 **66**(12): p. 1182-1186.
- 40 536 16. Ding, Y.Y., *Risk adjustment: towards achieving meaningful comparison of health outcomes in the*  
41 537 *real world*. Ann Acad Med Singapore, 2009. **38**(6): p. 552-7.
- 42 538 17. D'Agostino, R.B., Jr., *Propensity score methods for bias reduction in the comparison of a*  
43 539 *treatment to a non-randomized control group*. Stat Med, 1998. **17**(19): p. 2265-81.
- 44 540 18. Pattanayak, C.W., D.B. Rubin, and E.R. Zell, *Propensity score methods for creating covariate*  
45 541 *balance in observational studies*. Rev Esp Cardiol (Engl Ed), 2011. **64**(10): p. 897-903.
- 46 542 19. Coca-Perrillon, M., *Local and global optimal propensity score matching*. . SAS Global Forum  
47 543 2007(185).
- 48 544 20. Remler, D.K. and G.G. Van Ryzin, *Research Methods in Practice. Strategies for Description and*  
49 545 *Causation*. 2011: SAGE Publications, Inc. 616.
- 50 546 21. Gebel, M. and J. Vossemer, *The impact of employment transitions on health in Germany. A*  
51 547 *difference-in-differences propensity score matching approach*. Soc Sci Med, 2014. **108**: p. 128-  
52 548 36.
- 53 549 22. Gissler, M. and J. Haukka, *Finnish health and social welfare registers in epidemiological research*.  
54 550 *Norsk Epidemiologi*, 2004. **14**(1): p. 113-120.
- 55 551 23. Briand, C., et al., *Work and mental health: learning from return-to-work rehabilitation programs*  
56 552 *designed for workers with musculoskeletal disorders*. International journal of law and psychiatry,  
57 553 2007. **30**(4-5): p. 444-57.
- 58 554 24. Thornicroft, G., et al., *Reducing stigma and discrimination: Candidate interventions*. International  
59 555 *journal of mental health systems*, 2008. **2**(1): p. 3.
- 60 556 25. van Oostrom, S.H., et al., *Development of a workplace intervention for sick-listed employees with*  
557 *stress-related mental disorders: Intervention Mapping as a useful tool*. BMC health services  
558 2007. **7**: p. 127.
- 559 26. Allebeck, P. and A. Mastekaasa, *Swedish Council on Technology Assessment in Health Care*  
560 *(SBU). Chapter 5. Risk factors for sick leave - general studies*. Scandinavian journal of public  
561 health. Supplement, 2004. **63**: p. 49-108.

1  
2  
3  
4  
5  
6  
7  
8  
9  
10  
11  
12  
13  
14  
15  
16  
17  
18  
19  
20  
21  
22  
23  
24  
25  
26  
27  
28  
29  
30  
31  
32  
33  
34  
35  
36  
37  
38  
39  
40  
41  
42  
43  
44  
45  
46  
47  
48  
49  
50  
51  
52  
53  
54  
55  
56  
57  
58  
59  
60

27. Steenstra, I.A., *Prognostic factors for duration of sick leave in patients sick listed with acute low back pain: a systematic review of the literature*. Occupational and Environmental Medicine, 2005. **62**(12): p. 851-860.

28. Cornelius, L.R., et al., *Prognostic Factors of Long-term Disability Due to Mental Disorders: A Systematic Review*. Journal of Occupational Rehabilitation, 2010. **21**(2): p. 259-274.

For peer review only

568 Table 1. Characteristics of participants in partial and full sick leave group at the time of  
569 intervention (n, %).

|                                          | Partial sick leave n =1738 | Full sick leave n = 56 754        |
|------------------------------------------|----------------------------|-----------------------------------|
| <b>Sex (%)</b>                           |                            |                                   |
| Female                                   | 1 236 (71.1)               | 30 058 (53.0)                     |
| <b>Age (years) (%)</b>                   |                            |                                   |
| 16–34                                    | 217 (12.5)                 | 10 901 (19.2)                     |
| 35–44                                    | 430 (24.7)                 | 11 231 (19.8)                     |
| 45–54                                    | 753 (43.3)                 | 18 740 (33.0)                     |
| 55–65                                    | 338 (19.5)                 | 15 882 (28.0)                     |
| Mean (SD)                                | 46.2 (9.0)                 | 45.7 (11.3)                       |
| <b>Annual gross income (€) (%)</b>       |                            |                                   |
| - 30 000                                 | 1 237 (71.2)               | 46 119 (81.3)                     |
| 30 001 – 60 000                          | 409 (23.5)                 | 9 593 (16.9)                      |
| 60 001 -                                 | 39 (2.2)                   | 732 (1.3)                         |
| Missing                                  | 53 (3.1)                   | 310 (0.5)                         |
| Median                                   | 24 618                     | 20 668                            |
| <b>Diagnostic categories (%)</b>         |                            |                                   |
| Mental disorders                         | 663 (38.2)                 | 14 255 (25.1)                     |
| Musculoskeletal diseases                 | 624 (35.9)                 | 20 613 (36.3)                     |
| Tumours                                  | 112 (6.4)                  | 3 031 (5.4)                       |
| Traumas                                  | 136 (7.8)                  | 8 416 (14.8)                      |
| Other                                    | 203 (11.7)                 | 10 439 (18.4)                     |
| <b>Insurance district (%)</b>            |                            |                                   |
| Northern                                 | 219 (12.6)                 | 7 764 (13.7)                      |
| Western                                  | 259 (14.9)                 | 7 824 (13.8)                      |
| Eastern                                  | 194 (11.2)                 | 8 525 (15.0)                      |
| South-Western                            | 410 (23.6)                 | 13 254 (23.3)                     |
| Southern                                 | 656 (37.7)                 | 19 349 (34.1)                     |
| Missing                                  | 0 (0.0)                    | 38 (0.1)                          |
| <b>Occupational branch (%)</b>           |                            | (non-imputed subsample n = 4 347) |
| Technical and scientific work etc.       | 193 (11.1)                 | 409 (9.4)                         |
| Social and healthcare services           | 516 (29.7)                 | 719 (16.5)                        |
| Administration and office work           | 293 (16.9)                 | 413 (9.5)                         |
| Commercial work                          | 113 (6.5)                  | 288 (6.6)                         |
| Agriculture and forestry                 | 50 (2.9)                   | 214 (4.9)                         |
| Transport                                | 60 (3.4)                   | 269 (6.2)                         |
| Industrial and construction work, mining | 309 (17.8)                 | 1 146 (26.4)                      |
| Service work                             | 204 (11.7)                 | 889 (20.5)                        |

570

Table 2. Comparison of work participation (%) between partial and full sick leave group (GLM repeated measures design).

| Work participation (%)                      |        |                                               |                                               |                                             |       |                                           |             |       |
|---------------------------------------------|--------|-----------------------------------------------|-----------------------------------------------|---------------------------------------------|-------|-------------------------------------------|-------------|-------|
|                                             | n      | Pre-intervention period ( T1)<br>Mean (95%CI) | Post-intervention period (T2)<br>Mean (95%CI) | Post-Pre difference (T2-T1)<br>Mean (95%CI) | p     | Difference in differences<br>Mean (95%CI) | F-statistic | p     |
| <b>All<sup>1</sup></b>                      |        |                                               |                                               |                                             |       |                                           |             |       |
| Partial sick leave                          | 1 685  | 86.6 (85.2 to 88.1)                           | 65.4 (63.4 to 67.4)                           | -21.2 (-23.4 to -19.1)                      | 0.001 | 5.3 (3.1 to 7.5)                          | 22.8        | 0.001 |
| Full sick leave                             | 56 406 | 79.4 (79.1 to 79.6)                           | 52.9 (52.5 to 53.2)                           | -26.5 (-26.9 to -26.2)                      | 0.001 |                                           |             |       |
| <b>Males<sup>2</sup></b>                    |        |                                               |                                               |                                             |       |                                           |             |       |
| Partial sick leave                          | 490    | 86.6 (84.0 to 89.1)                           | 62.7 (59.0 to 66.5)                           | -23.9 (-27.9 to -19.9)                      | 0.001 | 6.3 (2.3 to 10.3)                         | 9.3         | 0.002 |
| Full sick leave                             | 26 507 | 80.3 (80.0 to 80.7)                           | 50.2 (49.7 to 50.7)                           | -30.1 (-30.7 to -29.6)                      | 0.001 |                                           |             |       |
| <b>Females<sup>2</sup></b>                  |        |                                               |                                               |                                             |       |                                           |             |       |
| Partial sick leave                          | 1 195  | 85.4 (83.7 to 87.0)                           | 66.9 (64.6 to 69.3)                           | -18.4 (-21.0 to -15.9)                      | 0.001 | 4.9 (2.4 to 7.5)                          | 14.2        | 0.001 |
| Full sick leave                             | 29 889 | 78.6 (78.2 to 78.9)                           | 55.2 (54.7 to 55.7)                           | -23.4 (-23.9 to -22.9)                      | 0.001 |                                           |             |       |
| <b>16-34 years<sup>1</sup></b>              |        |                                               |                                               |                                             |       |                                           |             |       |
| Partial sick leave                          | 210    | 89.3 (85.8 to 92.8)                           | 75.5 (70.2 to 80.9)                           | -13.8 (-19.6 to -8.0)                       | 0.001 | 2.8 (-1.1 to 10.6)                        | 2.5         | 0.111 |
| Full sick leave                             | 10 759 | 84.6 (84.1 to 85.1)                           | 66.1 (65.3 to 66.8)                           | -16.6 (-20.8 to -12.5)                      | 0.001 |                                           |             |       |
| <b>35-44 years<sup>1</sup></b>              |        |                                               |                                               |                                             |       |                                           |             |       |
| Partial sick leave                          | 424    | 84.7 (81.9 to 87.5)                           | 68.1 (64.2 to 72.0)                           | -16.6 (-20.8 to -12.5)                      | 0.001 | 2.0 (-2.2 to 6.2)                         | 0.9         | 0.352 |
| Full sick leave                             | 11 177 | 78.4 (77.9 to 79.0)                           | 59.8 (59.1 to 60.5)                           | -18.6 (-19.4 to -17.8)                      | 0.001 |                                           |             |       |
| <b>45-54 years<sup>1</sup></b>              |        |                                               |                                               |                                             |       |                                           |             |       |
| Partial sick leave                          | 725    | 86.9 (84.7 to 89.0)                           | 65.7 (62.6 to 68.8)                           | -21.1 (-24.4 to -17.9)                      | 0.001 | 4.7 (1.4 to 8.0)                          | 7.9         | 0.005 |
| Full sick leave                             | 18 659 | 77.6 (77.2 to 78.1)                           | 51.8 (51.2 to 52.4)                           | -25.9 (-26.5 to -25.2)                      | 0.001 |                                           |             |       |
| <b>55-65 years<sup>1</sup></b>              |        |                                               |                                               |                                             |       |                                           |             |       |
| Partial sick leave                          | 326    | 89.6 (86.3 to 92.9)                           | 57.0 (52.3 to 61.7)                           | -32.6 (-37.7 to -27.5)                      | 0.001 | 5.7 (0.5 to 10.8)                         | 4.7         | 0.03  |
| Full sick leave                             | 15 811 | 78.5 (78.0 to 78.9)                           | 40.2 (39.5 to 40.8)                           | -38.3 (-39.0 to -37.6)                      | 0.001 |                                           |             |       |
| <b>Musculoskeletal diseases<sup>3</sup></b> |        |                                               |                                               |                                             |       |                                           |             |       |
| Partial sick leave                          | 598    | 87.0 (84.8 to 89.3)                           | 60.3 (57.0 to 63.6)                           | -26.7 (-30.3 to -23.2)                      | 0.001 | 0.7 (-2.9 to 4.3)                         | 0.14        | 0.712 |
| Full sick leave                             | 20 537 | 79.7 (79.4 to 80.1)                           | 52.3 (51.7 to 52.9)                           | -27.4 (-28.0 to -26.8)                      | 0.001 |                                           |             |       |
| <b>Mental disorders<sup>3</sup></b>         |        |                                               |                                               |                                             |       |                                           |             |       |
| Partial sick leave                          | 645    | 84.6 (82.2 to 87.1)                           | 67.0 (63.8 to 70.3)                           | -17.6 (-21.3 to -13.9)                      | 0.001 | 12.8 (9.0 to 16.5)                        | 43.8        | 0.001 |
| Full sick leave                             | 14 136 | 74.6 (74.0 to 75.1)                           | 44.2 (43.5 to 44.9)                           | -30.4 (-31.1 to -29.6)                      | 0.001 |                                           |             |       |



Table 2. Continued.

| Work participation (%)                         |        |                                                  |                                                  |                                                |       |                                              |                 |       |
|------------------------------------------------|--------|--------------------------------------------------|--------------------------------------------------|------------------------------------------------|-------|----------------------------------------------|-----------------|-------|
|                                                | n      | Pre-intervention<br>period ( T1)<br>Mean (95%CI) | Post-intervention<br>period (T2)<br>Mean (95%CI) | Post-Pre difference<br>(T2-T1)<br>Mean (95%CI) | p     | Difference in<br>differences<br>Mean (95%CI) | F-<br>statistic | p     |
| <b>Traumas<sup>3</sup></b>                     |        |                                                  |                                                  |                                                |       |                                              |                 |       |
| Partial sick leave                             | 132    | 86.7 (82.0 to 91.3)                              | 68.1 (61.5 to 74.6)                              | -18.6 (-25.3 to -11.8)                         | 0.001 | -3.2 (-10.0 to 3.5)                          | 0.89            | 0.348 |
| Full sick leave                                | 8 312  | 82.9 (82.3 to 91.3)                              | 67.6 (66.7 to 68.4)                              | -15.3 (-16.2 to -14.5)                         | 0.001 |                                              |                 |       |
| <b>Tumours<sup>3</sup></b>                     |        |                                                  |                                                  |                                                |       |                                              |                 |       |
| Partial sick leave                             | 109    | 90.6 (85.9 to 95.4)                              | 75.0 (67.4 to 82.5)                              | -15.7 (-23.5 to -7.9)                          | 0.001 | 5.3 (-2.6 to 13.2)                           | 1.7             | 0.190 |
| Full sick leave                                | 3 021  | 87.2 (86.3 to 88.1)                              | 66.2 (64.8 to 67.6)                              | -21.0 (-22.4 to -19.5)                         | 0.001 |                                              |                 |       |
| <b>Other diagnostic categories<sup>3</sup></b> |        |                                                  |                                                  |                                                |       |                                              |                 |       |
| Partial sick leave                             | 201    | 87.4 (83.4 to 91.4)                              | 63.6 (57.8 to 69.4)                              | -23.8 (-30.0 to -17.6)                         | 0.001 | 6.2 (-0.05 to 12.5)                          | 3.8             | 0.052 |
| Full sick leave                                | 10 400 | 80.2 (79.6 to 80.7)                              | 50.1 (49.3 to 50.9)                              | -30.0 (-30.9 to -29.2)                         | 0.001 |                                              |                 |       |

Adjusted for <sup>1</sup> age, sex, income, diagnosis, occupational group, insurance district, <sup>2</sup> age, income, diagnosis, occupational group, insurance district, <sup>3</sup> age, sex, income, occupational group, insurance district.

Table 3. Comparison of work participation (%) between partial and full sick leave group (GLM repeated measures design) in the PS-matched subsample.

| <b>Work participation (%)</b>                  |           |                                            |             |        |
|------------------------------------------------|-----------|--------------------------------------------|-------------|--------|
|                                                | n (pairs) | Difference in differences<br>Mean (95% CI) | F-statistic | p      |
| <b>All<sup>1</sup></b>                         | 1 660     | 9.8 (5.9 to 13.7)                          | 60.8        | 0.0001 |
| <b>Males<sup>2</sup></b>                       | 489       | 12.4 (6.9 to 17.9)                         | 28.1        | 0.002  |
| <b>Females<sup>2</sup></b>                     | 1 171     | 7.2 (3.1 to 11.4)                          | 34.0        | 0.0001 |
| <b>16-34 years</b>                             | 209       | 8.5 (0.5 to 16.6)                          | 9.5         | 0.002  |
| <b>35-44 years</b>                             | 422       | 6.7 (0.7 to 12.6)                          | 9.8         | 0.002  |
| <b>45-54 years</b>                             | 708       | 11.1 (6.3 to 15.9)                         | 30.3        | 0.0001 |
| <b>55-65 years</b>                             | 321       | 12.9 (6.5 to 19.4)                         | 12.2        | 0.001  |
| <b>Musculoskeletal diseases<sup>3</sup></b>    | 598       | 6.3 (1.5 to 11.2)                          | 6.0         | 0.015  |
| <b>Mental disorders<sup>3</sup></b>            | 621       | 18.9 (14.2 to 23.5)                        | 59.9        | 0.0001 |
| <b>Traumas<sup>3</sup></b>                     | 131       | 0.3 (-9.3 to 9.9)                          | 0.0         | 0.99   |
| <b>Tumours<sup>3</sup></b>                     | 109       | 12.5 (1.8 to 23.2)                         | 5.9         | 0.016  |
| <b>Other diagnostic categories<sup>3</sup></b> | 201       | 11.1 (3.3 to 18.9)                         | 7.6         | 0.006  |

Adjusted for

<sup>1</sup> age, sex, income, diagnosis, occupational group, insurance district,

<sup>2</sup> age, income, diagnosis, occupational group, insurance district,

<sup>3</sup> age, sex, income, occupational group, insurance district.

1  
2  
3  
4  
5  
6  
7  
8  
9  
10  
11  
12  
13  
14  
15  
16  
17  
18  
19  
20  
21  
22  
23  
24  
25  
26  
27  
28  
29  
30  
31  
32  
33  
34  
35  
36  
37  
38  
39  
40  
41  
42  
43  
44  
45  
46  
47  
48  
49

For peer review only

1  
2  
3  
4  
5  
6  
7  
8  
9  
10  
11  
12  
13  
14  
15  
16  
17  
18  
19  
20  
21  
22  
23  
24  
25  
26  
27  
28  
29  
30  
31  
32  
33  
34  
35  
36  
37  
38  
39  
40  
41  
42  
43  
44  
45  
46  
47  
48  
49  
50  
51  
52  
53  
54  
55  
56  
57  
58  
59  
60

1 **EFFECTIVENESS OF INTRODUCTION OF NEW LEGISLATION OF**  
2 **PARTIAL SICKNESS BENEFIT ON WORK PARTICIPATION: A QUASI-**  
3 **EXPERIMENT IN FINLAND**

4

For peer review only

## Abstract

**Objectives** To examine the effect of new legislation on partial sickness benefit on subsequent work participation of Finns with long-term sickness absence. Additionally, we investigated whether the effect differed by sex, age, or diagnostic category.

**Design** A register-based quasi-experimental study compared the intervention (partial sick leave) group with the comparison (full sick leave) group regarding their pre-post differences in the outcome. The pre-intervention and post-intervention-period each consisted of 365 days.

**Setting** Nationwide, individual-level data on the beneficiaries of partial or full sickness benefit in 2008 were obtained from national sickness insurance, pension and earnings registers.

**Participants** 1738 persons in the intervention and 56754 persons in the comparison group.

**Outcome** Work participation, measured as the proportion (%) of time within 365 days when participants were gainfully employed and did not receive either partial or full ill-health-related or unemployment benefits.

**Results** Although work participation declined in both groups, the decline was 5% (absolute difference-in-differences) smaller in the intervention than in the comparison group, with a minor sex difference. The beneficial effect of partial sick leave was seen especially among those aged 45 to 54 (5%) and 55 to 65 (6%) and in mental disorders (13%). When the groups were rendered more exchangeable (propensity score-matching on age, sex, diagnostic category, income, occupation, insurance district, work participation, sickness absence, rehabilitation periods and unemployment prior to intervention and their interaction terms), the effects on work participation were doubled and seen in all age groups and in other diagnostic categories than traumas.

**Conclusions** The results suggest that the new legislation has potential to increase work participation of the population with long-term sickness absence in Finland. If applied in a larger scale, partial sick leave may turn out to be a useful tool in reducing withdrawal of workers from the labor market due to health reasons.

1  
2 35 **Article Summary**  
3 36  
4 37

5 38 Strengths and limitations of the study:  
6 39

- 7  
8 40 • Applying nationally representative population register-based data with valid information  
9 41 on the payment of health- and unemployment-related allowances in Finland.  
10 42  
11 43 • Applying a quasi-experimental study-design with difference-in differences and  
12 44 propensity score analysis to control for selection on both observed and unobserved  
13 45 factors.  
14 46  
15 47 • Registers provided only a limited number of background characteristics.  
16  
17  
18  
19 48  
20  
21 49  
22  
23  
24  
25  
26  
27  
28  
29  
30  
31  
32  
33  
34  
35  
36  
37  
38  
39  
40  
41  
42  
43  
44  
45  
46  
47  
48  
49  
50  
51  
52  
53  
54  
55  
56  
57  
58  
59  
60

## 50 Introduction

51

52 The need to increase work participation of working age people is currently a matter of concern  
53 in many Western countries. In Finland, delayed or lacking labor market attachment of young  
54 people, absence from work during later years and early exit from labor market have all raised  
55 alarm. To counteract these trends, an active labor market policy has been adopted, including  
56 the introduction of partial social security benefits and other tools to increase the so called  
57 flexicurity of the labor market [1]. In Finland, legislation on partial sickness benefit was  
58 introduced in 2007. The new benefit allowed for the first time to combine part-time sick-leave  
59 with part-time work.

60

61 The Finnish social insurance is based on the Nordic Model. Everyone who is aged from 16 to  
62 67, non-retired and living permanently in the country (employees, self-employed, students,  
63 unemployed job seekers and those on sabbatical or alternation leave) and also nonresidents  
64 working for at least four months in Finland are covered by statutory sickness insurance. The  
65 sickness allowances are financed by employers, employees and the state and they are  
66 administrated by the Social Insurance Institution of Finland (SII). Statutory benefits can rest  
67 on previous earnings or benefits or the minimum allowance can be granted. For the earnings-  
68 related occupational sickness benefits, a minimum of three months of employment is required.

69

70 At present, the Finnish national sickness benefit scheme includes a full and a partial sickness  
71 benefit. A medical certificate is an absolute requirement for the two sickness benefits to be  
72 granted. In order to be eligible for the partial benefit an employee has to be eligible for a full  
73 benefit as well, but according to medical judgment partial return to work is safe enough.  
74 Partial sick leave is thus alternative to full sick leave and it is always medically certified. During  
75 the first years after introducing the partial sickness benefit in Finland, a partial sick leave had  
76 to be directly preceded by a period of full sick leave of at least 60 days and the partial sickness  
77 benefit could be granted from a minimum of 12 to a maximum of 72 working days. During  
78 partial sick leave, work time and salary are reduced by 40 – 60% of the regular work hours  
79 and work tasks can be modified if necessary. The employee and the employer sign a fixed term

1  
2 80

3  
4 81 work contract for the part-time work. In Finland, the use of partial sick leave is voluntary for  
5  
6 82 the individual. The employer, as well, is entitled to decline the use of the benefit in case the  
7  
8 83 work arrangements needed at the work place are not feasible.

9  
10 84

11 85 Sickness absence rates are in many countries higher among women compared with men [2].

12  
13 86 Also partial sick leave has been more frequently used by women [3]. It is known that sickness  
14  
15 87 absence increases with age [2]. It is also recognized that challenges of return to work are  
16  
17 88 different for example in musculoskeletal diseases and mental disorders. In the latter category,  
18  
19 89 the outflow from disability benefits due to recovery has been lower [4].

20  
21 90

22  
23 91 The current evidence on the effects of partial sick leave on return to work or work participation  
24  
25 92 is partly inconsistent. In the other Nordic countries, partial sick leave has been found to  
26  
27 93 increase the likelihood of return to regular working hours [5, 6] and to be associated with  
28  
29 94 higher subsequent employment rate [7]. No effect of active sick leave (return to work to  
30  
31 95 modified duties) on the average number of sick leave days or long-term disability was detected  
32  
33 96 in a Norwegian cluster randomized controlled trial [8]. There is some discrepancy in the  
34  
35 97 findings on the effectiveness of partial sick leave in mental disorders. A Danish study [9] found  
36  
37 98 no effect, whereas a Swedish study [10] reported a weak effect of partial sick leave on full  
38  
39 99 recovery in the beginning of work disability due to mental disorders and a stronger effect when  
40  
41 100 partial sick leave was assigned after 60 days of full sick leave.

42  
43 101

44  
45 102 In a randomized controlled trial among persons with musculoskeletal disorders we found that  
46  
47 103 early part-time sick leave predicted faster sustained return to work than full sick leave [11].

48  
49 104 The beneficial effect of partial sick leave on work retention was also observed at population  
50  
51 105 level [12, 13]. Partial sick leave was associated in the short term with decreased work  
52  
53 106 retention, in terms of increased subsequent sickness absence. In the long-term it was  
54  
55 107 associated with increased work retention, in terms of increased subsequent use of partial  
56  
57 108 disability pension and decreased use of full disability pension. These findings imply the  
58  
59 109 necessity to use an outcome that simultaneously accounts for different indicators of work  
60



1  
2 110 participation. Some of these previous observational studies have suffered from limited data  
3  
4 111 samples and narrow generalizability of findings [5, 9], self-reported data [9], and  
5  
6 112 incomprehensive operationalization and measurement of work participation [5, 6, 10, 12, 13].

7  
8 113

9  
10 114 In order for policy makers to be able to make well informed decisions in the area of social and  
11  
12 115 health policies, scientific evaluation of the effectiveness of population level interventions, e.g.  
13  
14 116 introducing new legislation or policy change is needed [14]. Natural or quasi-experiments  
15  
16 117 have successfully been used in connection with various population level interventions in the  
17  
18 118 field of public health when planned experimentation, i.e. manipulation of exposure, has not  
19  
20 119 been possible [15]. In the field of work disability research, this approach has, however been  
21  
22 120 rare [2].

23  
24 121

25 122 This study examined the effects of the new Finnish legislation **that enabled the use of partial**  
26  
27 123 **sickness benefit** on subsequent work participation. For this we compared beneficiaries of partial  
28  
29 124 sickness benefit with those receiving full sickness benefit a year after the law on partial sick  
30  
31 125 leave was enacted. We utilized a quasi-experimental design with an integrated measure of  
32  
33 126 work participation. Analyses were carried out in an individual-level register-based data  
34  
35 127 representative of the Finnish working population with long-term sickness absence. We  
36  
37 128 examined whether the effects of partial sick leave on subsequent work participation differed by  
38  
39 129 sex, age, or diagnostic category of the benefit receivers.

40  
41 130

42  
43 131

## 44 132 **Methods**

45  
46 133

### 47 134 *Study design and setting*

48  
49 135 The population level intervention of interest in this study was the introduction of partial sick  
50  
51 136 leave in Finland in 2007. We conducted a quasi-experimental study following recent guidelines  
52  
53 137 on evaluating population health interventions [15]. This design was chosen to minimize the  
54  
55 138 effect of both measured and unmeasured confounding. We compared the intervention (partial  
56  
57 139 sick leave) group with the comparison (full sick leave) group regarding their pre-post  
58  
59  
60

1  
2 140 differences in work participation. The pre-intervention (T1) and post-intervention (T2) study  
3  
4 141 period each consisted of 365 days. A wash-out-period of one year was set **pre and post**  
5  
6 142 **intervention (Figure 1)** in order to obtain a robust effect of the intervention on work  
7  
8 143 participation. These time-windows were allowed to move according to the timing of the  
9  
10 144 individual's sick leave period.

11 145

12  
13 146 <Figure 1>

14  
15 147

16  
17 148 Individual-level data were derived from the national sickness insurance register of the SII and  
18  
19 149 the pension and earnings registers of the Finnish Centre for Pensions. Data from these three  
20  
21 150 registers were linked on the basis of social security numbers of the participants. The social  
22  
23 151 insurance register provided information on all medically certified and compensated sickness  
24  
25 152 absence spells, temporary and permanent national disability pensions, and old age pensions in  
26  
27 153 Finland. The registers of the Finnish Centre for Pensions contained information on employment  
28  
29 154 periods, earnings-related pensions and unsalaried periods due to disability, rehabilitation or  
30  
31 155 unemployment. Written consent from the individuals was not needed as only encrypted  
32  
33 156 register data were obtained by the researchers carrying out the analyses in the Finnish  
34  
35 157 Institute of Occupational Health.

36  
37 158

### 38 39 159 *Participants*

40  
41 160 Participants that were granted a partial sickness benefit (intervention group) were compared  
42  
43 161 with those who received a full sickness benefit (comparison group). A total sample of  
44  
45 162 individuals who had received either partial sickness benefit (n = 1 838) or full sickness benefit  
46  
47 163 (n = 67 086) in 2007 - 2008 and whose compensated sickness absence period had ended  
48  
49 164 between 1 January and 31 December 2008 was drawn from the national sickness insurance  
50  
51 165 register. Since a full time sickness absence of 60 working days had to precede partial sick  
52  
53 166 leave, only those with full sick leave ending with an uninterrupted period of at least 60 days of  
54  
55 167 payment of the benefit were included in the total sample. Thus, in our sample, receivers of full  
56  
57 168 sickness benefit had not received partial sickness benefit, but they would have been entitled to  
58  
59 169 it as for the length of the preceding full time sickness absence.

1  
2 170 Since eligibility for a partial sickness benefit required a prior work contract, we excluded from  
3  
4 171 the analyses those who did not have any employment periods (n=2 and n=4 923) during the  
5  
6 172 entire study period. We additionally excluded those who had died (n=24 in the partial sick  
7  
8 173 leave group and n=2 600 in the full sick leave group) or moved to old age pension (n=1 and  
9  
10 174 n=354, respectively), had not turned 16 at the time of the first data collection period (T1)  
11  
12 175 (n=3) or whose sickness absence periods (ending in 2008) extended beyond the time-frame of  
13  
14 176 data collection (n=66 and n=1 024). The final sample included 1 738 participants in the partial  
15  
16 177 sick leave group and 56 754 participants in the full sick leave group. We focused our analyses  
17  
18 178 in the four main diagnostic groups in which partial sickness benefit has most frequently been  
19  
20 179 used, i.e. musculoskeletal diseases, mental disorders, traumas and tumors (M, F, S and T, and  
21  
22 180 C and D-categories in ICD-10, respectively). All other diagnoses were merged in one group.

23 181

24  
25 182 *Outcome measure*

26  
27  
28 183 Work participation was operationalized as the time the individuals were likely to have actually  
29  
30 184 participated in gainful employment. It was approximated as the proportion (%) of time within  
31  
32 185 365 days when participants had an employment contract and did not receive either partial or  
33  
34 186 full ill-health-related benefits (sickness benefits, rehabilitation allowances, disability pensions)  
35  
36 187 or unemployment benefits. Work participation was calculated for T1 and T2. It was assumed  
37  
38 188 that when receiving partial benefits, the participants worked half of the work time (which is  
39  
40 189 typically the case in Finland).

41 190

42  
43 191 *Covariates*

44  
45  
46 192 Data on sex, dates of birth and death, insurance district (region), annual gross income in  
47  
48 193 2007, diagnostic codes (ICD-10), and occupational branch were obtained from the sickness  
49  
50 194 insurance register. Information on occupation was available for all participants in the  
51  
52 195 intervention group and for a random sample of 7.7% of the participants in the comparison  
53  
54 196 group.

55  
56 197

57

58

59

60

198 *Data analyses*

199 The distributions of all variables were compared between the total full sickness benefit group  
200 (n = 67 086) and the subsample of those participants in the full sickness benefit group for  
201 whom the registers provided information on occupational branch (n = 4 347). Since no  
202 differences in the distributions were detected, we assumed that information on occupational  
203 branch was missing at random. Multiple imputation was used to compensate for the missing  
204 data on occupational branch in the comparison group. For this, we generated multiple imputed  
205 data sets (n=10) using the *proc mi* of SAS. The imputation model included all covariates.  
206  
207 Propensity score with 1:1 matching was used to match individuals on the probability that they  
208 would belong to the intervention (partial sick leave) group. Individuals that were matched to  
209 each other had equal or nearly equal (close enough) estimated propensity scores.

210

211 Difference-in differences- (DID-) and propensity score- (PS-) analyses are methods that are  
212 complementary to each other and can be applied in causal inference to counter selection bias  
213 and confounding [16]. We applied the DID method alone and in combination with PS-  
214 matching. Combining methods to counter bias and confounding from different sources and  
215 comparing the results has been encouraged [15]. The DID-method can be applied to control  
216 for fixed unobserved individual differences and common trends.

217

218 The DID-method allows one to estimate the difference in pre-post, within subject, differences  
219 between the intervention and the comparison group. The effect of partial sick leave on work  
220 participation was consequently estimated as the difference in pre-post-differences (differences  
221 between T2 and T1) between partial and full sick leave groups. The effect was estimated using  
222 general linear model with repeated measures design. F-statistic for the interaction term  
223 between the group assignment and change of work participation in time was applied as the  
224 difference-in-differences statistic.

225

226 Propensity score is defined as conditional probability of being exposed to a certain intervention  
227 given observed covariates [15, 17, 18]. It is applied to balance the covariates in two groups

1  
2 228 and thus to reduce bias. We computed PS (i.e. probability of being exposed to partial sick  
3  
4 229 leave) by logistic regression for all participants. The following set of variables and their  
5  
6 230 interaction terms were included in the logistic regression model: age, sex, diagnostic category,  
7  
8 231 income, occupation, insurance district, and work participation, sickness absence, rehabilitation  
9  
10 232 periods and unemployment at T1. **The best fit model was chosen.**

11  
12 233

13 234 Thereafter we matched the partial sick leave and full sick leave groups on the estimated  
14  
15 235 propensity score using local optimal (greedy) algorithm [19]. The matching was performed  
16  
17 236 within (sex x diagnostic category)-strata. Subsequently DID-analysis was also carried out in  
18  
19 237 the matched subsample.

20  
21 238

22  
23 239 Several sensitivity analyses were carried out. The analyses were run separately for participants  
24  
25 240 for whom the registers provided information on occupational branch and for the total sample in  
26  
27 241 which imputed data on occupational branch were utilized for the comparison group. To  
28  
29 242 examine the group difference in work participation at T1 (due to unemployment or sick leave)  
30  
31 243 as source of reduced group comparability, the analyses were carried out separately among  
32  
33 244 participants who did not receive unemployment benefits at T1 and among participants with  
34  
35 245 100% of work participation at T1.

36  
37 246

38  
39 247

## 40 41 248 **Results**

### 42 43 44 249 *Descriptive characteristics of the study population*

45  
46 250 Information on the background characteristics of the intervention and comparison group in the  
47  
48 251 total analysed sample is shown in Table 1. Women constituted 71% of the partial sick leave  
49  
50 252 group and 53% of the full sick leave group. The partial benefit was most common among those  
51  
52 253 who were aged between 35 and 54, whereas the full benefit among those aged from 45 to 65.  
53  
54 254 The income level of those in the partial sick leave group was higher than of those in the full  
55  
56 255 sick leave group. The partial sickness benefit was most often used in connection with mental  
57  
58 256 disorders and musculoskeletal diseases, while the full benefit was most often used in

1  
2 257 musculoskeletal diseases. The use of the partial benefit was most frequent in social and  
3  
4 258 healthcare services and administrative and office work, whereas the full benefit was most  
5  
6 259 commonly used in industrial and service work. No large regional differences in the use of the  
7  
8 260 benefits were detected.

9  
10 261

11 262 <Table 1>

12  
13 263

14  
15 264 *Difference-in-differences in work participation between partial and full sick leave group*

16  
17 265

18  
19 266 In both groups the level of work participation decreased during the follow up, the absolute  
20  
21 267 reduction being larger in the full sick leave group (-26.5%) compared with the partial sick  
22  
23 268 leave group (-21.2%) (Table 2). The absolute overall difference-in-differences in work  
24  
25 269 participation was 5.3% (95% CI 3.1% to 7.5%).

26  
27 270

28  
29 271 The difference-in-differences in work participation tended to be larger in men than in women.

30  
31 272 In all age categories, work participation declined more in the full than in the partial sick leave  
32  
33 273 group. The difference in the decline was significant in age-categories 45-54 and 55-65. There  
34  
35 274 was no effect in those aged 35-44. In the youngest age category (16-34 years) the difference-  
36  
37 275 in-differences was large but statistically non-significant.

38  
39 276

40  
41 277 A statistically significantly larger effect (12.8% 95% CI 9.0% to 16.5%) was found in mental  
42  
43 278 disorders compared with the other diagnostic categories.

44  
45 279

46  
47 280 <Table 2>

48  
49 281

50  
51 282 The results found in the subsample of participants for whom the registers provided information  
52  
53 283 on occupational branch were very similar to those in the total sample (data not shown). The  
54  
55 284 exclusion of the participants who received unemployment benefits at T1 led to an absolute  
56  
57 285 increase in the difference-in-differences in work participation (DID 7.6%, 95% CI 5.4% to  
58  
59 286 9.7%). The difference-in- differences in work participation increased further (DID 9.5%, 95%

1  
2 287 CI 6.8% to 12.1%) when participants with reduced work participation (for any reason) at T1  
3  
4 288 were excluded from the analyses.

5 289

6 290

7  
8 291 *Difference-in-differences in work participation in the propensity score-matched subsample*

9 292

10  
11 293 The matching procedure resulted in a total of 1 660 matched pairs of participants. The

12  
13 294 propensity score matched partial sickness benefit receivers did not differ from full sickness

14  
15 295 benefit receivers with regard to age, gross income, number of unemployment days, sickness

16  
17 296 absence days, rehabilitation days or work participation at T1. There were some differences

18  
19 297 between the groups in the distribution of occupational branches and insurance districts

20  
21 298 (Appendix Table 1).

22  
23 299

24  
25 300 The results from the DID-analysis in the PS-matched subsample are presented in Table 3. The

26  
27 301 absolute overall difference-in-differences was increased to 9.8% (95% CI 5.9 to 13.7). A

28  
29 302 tendency for a larger DID in men than in women was also found in this subsample. The DID

30  
31 303 was still largest in those participants aged over 45 years, but in contrast to the total sample an

32  
33 304 effect was seen in the younger age categories as well. Differences between the diagnostic

34  
35 305 categories were reduced as compared to the total sample. The largest effect was still found in

36  
37 306 mental disorders. In addition, a statistically significant DID was also found in musculoskeletal

38  
39 307 diseases and tumours. Further adjustment for the differences in the distribution of occupation

40  
41 308 and insurance district between the intervention and comparison group, had no effect on the

42  
43 309 results of the DID-analysis.

44  
45 310

46  
47 311

48  
49 312 < Table 3 >

50  
51 313

52  
53 314

54  
55

56  
57

58  
59

60

1  
2 315 **Discussion**

3  
4  
5 316 *Principal findings*

6  
7 317 We applied a quasi-experimental design to study the population level effects of the  
8  
9 318 introduction of partial sickness benefit in Finland among a working population with long-term  
10  
11 319 sickness absence. It was found that partial sick leave had a positive effect on work  
12  
13 320 participation. Although the overall work participation declined from T1 to T2, at the population  
14  
15 321 level the decline was 5% (absolute difference) smaller among the receivers of partial sickness  
16  
17 322 benefit (intervention group) than among the receivers of full sickness benefit (comparison  
18  
19 323 group). The beneficial effect of partial sick leave was seen especially among those aged from  
20  
21 324 45 to 54 and 55 to 65 and in mental disorders. No major sex difference was detected. When  
22  
23 325 the groups were rendered more exchangeable, the effect on work participation was doubled,  
24  
25 326 and effects were seen in other diagnostic categories than traumas and all age groups.

26  
27 327

28  
29 328

30  
31 329 *Validity of the study*

32  
33 330

34  
35 331 An observational quasi-experimental study design can be applied to assess the effects of a  
36  
37 332 planned event or intervention, when randomized controlled trials are not ethical or feasible.  
38  
39 333 Observational studies can also better simulate real-world settings and offer more relevant  
40  
41 334 information in view of policy-making [20]. The internal validity of observational studies is lower  
42  
43 335 than that of randomized controlled trials due to possible selection according to exposure. For  
44  
45 336 this reason, an analytical approach called potential outcomes or counterfactual framework was  
46  
47 337 chosen. The term refers to the fact that in an ideal situation the exposed would be compared  
48  
49 338 to themselves when unexposed. Since this comparison is impossible, we need a comparable or  
50  
51 339 exchangeable comparison group. We utilized two methods (DID and PS) that have been  
52  
53 340 previously recommended and applied to control for selection on both observed factors and  
54  
55 341 unobserved fixed factors [15, 20, 21].

56  
57 342  
58  
59  
60



1  
2 343 In the DID- method, it is assumed that the unobserved characteristics in the studied groups  
3  
4 344 are stable and that the outcomes would change identically in these groups in the absence of  
5  
6 345 intervention. Consequently, the intervention and comparison groups should be identical,  
7  
8 346 except for the intervention status. However, it is sufficient that the groups are closely, though  
9  
10 347 not exactly, similar [15]. We included in the comparison group only participants who would  
11  
12 348 have been entitled to partial sickness benefit as for the length of the preceding sickness  
13  
14 349 absence. We also applied a short wash-out period, to minimize the intragroup differences  
15  
16 350 between the two time points. However, as full information on the eligibility of the participants  
17  
18 351 for partial sickness benefit was not available in the registers (e.g. severity of the health  
19  
20 352 problem and degree of remaining workability), we utilized matching on PS to further increase  
21  
22 353 the exchangeability of the groups. Moreover, at the time of the study, the national rates in  
23  
24 354 sickness absence were rather stable. The unemployment rate in Finland was relatively low  
25  
26 355 during the intervention in 2008 (6.4%), however the rates were similar at T1 (7.7%-8.4%)  
27  
28 356 and T2 (7.8%-8.4%).

29 357  
30  
31 358 We utilized nationwide population data with comprehensive individual-level register-based  
32  
33 359 information on ill-health- and unemployment-related absences from work. Personal  
34  
35 360 identification (social security) numbers enabled linking information from three separate source  
36  
37 361 registers. These registers have originally been established for administrative purposes, but the  
38  
39 362 data can also be used for research [22]. Among the advantages of register-based studies is a  
40  
41 363 low likelihood of selection and attrition bias. The source registers of this study provided valid  
42  
43 364 information on the receivers and payment days of the benefits. A weakness of the registers is  
44  
45 365 that they typically provide only a limited number of background characteristics of the  
46  
47 366 participants and other covariates. The process of assignment to partial sick leave is not  
48  
49 367 random. Most likely it is complex and it is affected by many actors (the patient, physician,  
50  
51 368 employer, and workplace) for which information cannot be found in the national registers.  
52  
53 369 Nevertheless, the factors that were included in the analyses have earlier been found to be  
54  
55 370 important predictors of the use of health-related social security benefits and also associated  
56  
57 371 with work disability and return to work.

58  
59 372  
60

1  
2 373 Information on diagnoses for sickness benefits was as well retrieved from registers and was  
3  
4 374 based on medical assessment. In case of a long-term sickness absence (lasting more than 60  
5  
6 375 days) in Finland, the sickness benefit is paid in shorter periods, each being covered with a  
7  
8 376 separate medical certificate. Diagnostic codes are transferred from these certificates to the  
9  
10 377 administrative registers. We used the latest (and presumably the most accurate) diagnostic  
11  
12 378 code provided for each long-term sickness absence in 2007-2008. Data on occupational branch  
13  
14 379 had to be imputed for the majority of participants in the comparison group. Nevertheless, the  
15  
16 380 sensitivity analyses suggested that using imputed data on occupation did not affect the results.  
17  
18 381 In contrast to earlier studies on the topic, work participation was approximated in the current  
19  
20 382 study by taking simultaneously into account the rate of different ill-health- and  
21  
22 383 unemployment-related benefits. We operationalized work participation as proportion of time  
23  
24 384 within a year not receiving ill-health related or unemployment benefits. Hence we had a  
25  
26 385 relatively comprehensive indicator of the availability of the participants for the labour market.

27 386

28 387

29 388 *Results in relation to earlier findings*

30 389

31  
32  
33 390 The overall results of this study are congruent with earlier findings, indicating positive effects  
34  
35 391 of partial sick leave on return to work and work retention [5-7, 12]. We found that partial sick  
36  
37 392 leave had a positive effect on future work participation especially in mental disorders, but the  
38  
39 393 results of the analyses in the subgroup suggested that the overall effect in the total sample  
40  
41 394 might be underestimated.

42 395

43  
44  
45 396 Our findings on the usefulness of partial sick leave in mental disorders, though not directly  
46  
47 397 comparable, are congruent with a study showing beneficial effects of partial sick leave on RTW  
48  
49 398 in mental disorders after 60 days of full sick leave [10], but differ from an earlier study  
50  
51 399 reporting no effect [9]. The literature suggests that returning and continuing at work may be  
52  
53 400 more challenging for those with mental disorders than with somatic problems (e.g.  
54  
55 401 musculoskeletal diseases) [23-25]. In addition, the outflow from disability benefits due to  
56  
57 402 recovery has been lower among those with mental disorders than with musculoskeletal

1  
2 403 diseases [4]. However, in our previous study we found an effect of partial sick leave on work  
3  
4 404 disability pension in both diagnostic categories, the effect tending to be larger in mental  
5  
6 405 disorders than in musculoskeletal diseases [12]. The diagnostic groups of musculoskeletal  
7  
8 406 diseases and mental disorders may differ in the degree of comparability of the partial and full  
9  
10 407 sick leave groups with regard to the background characteristics, severity of the health problem  
11  
12 408 and remaining work ability, number of sickness absences as well as in transition to  
13  
14 409 rehabilitation and unemployment. When the exchangeability of the groups was increased with  
15  
16 410 propensity score matching, a beneficial effect on work participation was detected also in  
17  
18 411 persons with musculoskeletal diseases and those with tumours.

19 412  
20  
21 413 Sickness absence is known to increase with age [26]. In addition, it has been found that return  
22  
23 414 to work after long-term sickness absence is less likely at higher ages [27, 28]. Partial sick  
24  
25 415 leave was found to be most frequently used and also most effective among middle-aged and  
26  
27 416 older workers. It may well be that work arrangements associated with partial sick leave are  
28  
29 417 more easily implemented by employees in a more established or stable work situation.

30 418

31 419

## 32 420 **Conclusions**

33 421

34  
35 422 The overall results of the effectiveness of partial sick leave on work participation suggest that  
36  
37 423 the new legislation on partial sickness benefit introduced in 2007 has potential to increase  
38  
39 424 work participation of the working population with long-term sickness absence in Finland. A  
40  
41 425 positive effect was seen especially in mental disorders. In the future – if applied in a larger  
42  
43 426 scale – partial sick leave may turn out to be an effective tool in reducing temporary and  
44  
45 427 permanent withdrawal of workers from the labour market due to health reasons.

46 428

## 47 429 **Figure legend**

48 430

49 431 Figure. Schematic presentation of the study design and difference-in-differences method. (T1  
50  
51 432 corresponds to pre-intervention period, T2 corresponds to post-intervention period).

433 **References**

434

1. Philips , E.R., Alloja J, Krillo K, Lauringson A, *Approaches to flexicurity: EU-models*. 2007, European foundation for the improvement of living and working conditions.
2. OECD, *Sickness, Disability and Work: Breaking the Barriers: A Synthesis of Findings across OECD countries*, OECD Publishing. 2010.
3. Kausto, J., et al., *Partial sick leave--review of its use, effects and feasibility in the Nordic countries*. Scand J Work Environ Health, 2008. **34**(4): p. 239-49.
4. OECD, *Sick on the job? Myths and Realities about Mental Health and Work*, in *Mental health and Work*,. 2012, OECD Publishing.
5. Andren, D. and M. Svensson, *Part-time sick leave as a treatment method for individuals with musculoskeletal disorders*. Journal of occupational rehabilitation, 2012. **22**(3): p. 418-26.
6. Hogelund, J., A. Holm, and J. McIntosh, *Does graded return-to-work improve sick-listed workers' chance of returning to regular working hours?* Journal of health economics, 2010. **29**(1): p. 158-69.
7. Markussen, S., A. Mykletun, and K. Roed, *The case for presenteeism - Evidence from Norway's sickness insurance program*. Journal of Public Economics, 2012. **96**(11-12): p. 959-972.
8. Scheel, I.B., et al., *Blind faith? The effects of promoting active sick leave for back pain patients: a cluster-randomized controlled trial*. Spine (Phila Pa 1976), 2002. **27**(23): p. 2734-40.
9. Hogelund, J., A. Holm, and L.F. Eplöv, *The effect of part-time sick leave for employees with mental disorders*. The journal of mental health policy and economics, 2012. **15**(4): p. 157-70.
10. Andren, D., *Does part-time sick leave help individuals with mental disorders recover lost work capacity?* J Occup Rehabil, 2014. **24**(2): p. 344-60.
11. Viikari-Juntura, E., et al., *Return to work after early part-time sick leave due to musculoskeletal disorders: a randomized controlled trial*. Scandinavian journal of work, environment & health, 2012. **38**(2): p. 134-43.
12. Kausto, J., et al., *Partial sick leave associated with disability pension: propensity score approach in a register-based cohort study*. BMJ open, 2012. **2**(6).
13. Kausto, J., et al., *Associations between partial sickness benefit and disability pensions: initial findings of a Finnish nationwide register study*. BMC Public Health, 2010. **10**: p. 361.
14. Grimshaw, J., et al., *Experimental and quasi-experimental designs for evaluating guideline implementation strategies*. Family practice, 2000. **17 Suppl 1**: p. S11-6.
15. Craig, P., et al., *Using natural experiments to evaluate population health interventions: new Medical Research Council guidance*. Journal of Epidemiology and Community Health, 2012. **66**(12): p. 1182-1186.
16. Ding, Y.Y., *Risk adjustment: towards achieving meaningful comparison of health outcomes in the real world*. Ann Acad Med Singapore, 2009. **38**(6): p. 552-7.
17. D'Agostino, R.B., Jr., *Propensity score methods for bias reduction in the comparison of a treatment to a non-randomized control group*. Stat Med, 1998. **17**(19): p. 2265-81.
18. Pattanayak, C.W., D.B. Rubin, and E.R. Zell, *Propensity score methods for creating covariate balance in observational studies*. Rev Esp Cardiol (Engl Ed), 2011. **64**(10): p. 897-903.
19. Coca-Perrillon, M., *Local and global optimal propensity score matching*. . SAS Global Forum 2007(185).
20. Remler, D.K. and G.G. Van Ryzin, *Research Methods in Practice. Strategies for Description and Causation*. 2011: SAGE Publications, Inc. 616.
21. Gebel, M. and J. Vossemer, *The impact of employment transitions on health in Germany. A difference-in-differences propensity score matching approach*. Soc Sci Med, 2014. **108**: p. 128-36.
22. Gissler, M. and J. Haukka, *Finnish health and social welfare registers in epidemiological research*. Norsk Epidemiologi, 2004. **14**(1): p. 113-120.
23. Briand, C., et al., *Work and mental health: learning from return-to-work rehabilitation programs designed for workers with musculoskeletal disorders*. International journal of law and psychiatry, 2007. **30**(4-5): p. 444-57.
24. Thornicroft, G., et al., *Reducing stigma and discrimination: Candidate interventions*. International journal of mental health systems, 2008. **2**(1): p. 3.
25. van Oostrom, S.H., et al., *Development of a workplace intervention for sick-listed employees with stress-related mental disorders: Intervention Mapping as a useful tool*. BMC health services research, 2007. **7**: p. 127.
26. Allebeck, P. and A. Mastekaasa, *Swedish Council on Technology Assessment in Health Care (SBU). Chapter 5. Risk factors for sick leave - general studies*. Scandinavian journal of public health. Supplement, 2004. **63**: p. 49-108.
27. Steenstra, I.A., *Prognostic factors for duration of sick leave in patients sick listed with acute low back pain: a systematic review of the literature*. Occupational and Environmental Medicine, 2005. **62**(12): p. 851-860.

- 1  
2 497 28. Cornelius, L.R., et al., *Prognostic Factors of Long-term Disability Due to Mental Disorders: A*  
3 498 *Systematic Review*. Journal of Occupational Rehabilitation, 2010. **21**(2): p. 259-274.  
4 499

5  
6  
7  
8  
9  
10  
11  
12  
13  
14  
15  
16  
17  
18  
19  
20  
21  
22  
23  
24  
25  
26  
27  
28  
29  
30  
31  
32  
33  
34  
35  
36  
37  
38  
39  
40  
41  
42  
43  
44  
45  
46  
47  
48  
49  
50  
51  
52  
53  
54  
55  
56  
57  
58  
59  
60

For peer review only

500

501 Table 1. Characteristics of participants in partial and full sick leave group at the time of  
502 intervention (n, %).

|                                          | Partial sick leave n =1738 | Full sick leave n = 56 754        |
|------------------------------------------|----------------------------|-----------------------------------|
| <b>Sex (%)</b>                           |                            |                                   |
| Female                                   | 1 236 (71.1)               | 30 058 (53.0)                     |
| <b>Age (years) (%)</b>                   |                            |                                   |
| 16–34                                    | 217 (12.5)                 | 10 901 (19.2)                     |
| 35–44                                    | 430 (24.7)                 | 11 231 (19.8)                     |
| 45–54                                    | 753 (43.3)                 | 18 740 (33.0)                     |
| 55–65                                    | 338 (19.5)                 | 15 882 (28.0)                     |
| Mean (SD)                                | 46.2 (9.0)                 | 45.7 (11.3)                       |
| <b>Annual gross income (€) (%)</b>       |                            |                                   |
| - 30 000                                 | 1 237 (71.2)               | 46 119 (81.3)                     |
| 30 001 – 60 000                          | 409 (23.5)                 | 9 593 (16.9)                      |
| 60 001 -                                 | 39 (2.2)                   | 732 (1.3)                         |
| Missing                                  | 53 (3.1)                   | 310 (0.5)                         |
| Median                                   | 24 618                     | 20 668                            |
| <b>Diagnostic categories (%)</b>         |                            |                                   |
| Mental disorders                         | 663 (38.2)                 | 14 255 (25.1)                     |
| Musculoskeletal diseases                 | 624 (35.9)                 | 20 613 (36.3)                     |
| Tumours                                  | 112 (6.4)                  | 3 031 (5.4)                       |
| Traumas                                  | 136 (7.8)                  | 8 416 (14.8)                      |
| Other                                    | 203 (11.7)                 | 10 439 (18.4)                     |
| <b>Insurance district (%)</b>            |                            |                                   |
| Northern                                 | 219 (12.6)                 | 7 764 (13.7)                      |
| Western                                  | 259 (14.9)                 | 7 824 (13.8)                      |
| Eastern                                  | 194 (11.2)                 | 8 525 (15.0)                      |
| South-Western                            | 410 (23.6)                 | 13 254 (23.3)                     |
| Southern                                 | 656 (37.7)                 | 19 349 (34.1)                     |
| Missing                                  | 0 (0.0)                    | 38 (0.1)                          |
| <b>Occupational branch (%)</b>           |                            | (non-imputed subsample n = 4 347) |
| Technical and scientific work etc.       | 193 (11.1)                 | 409 (9.4)                         |
| Social and healthcare services           | 516 (29.7)                 | 719 (16.5)                        |
| Administration and office work           | 293 (16.9)                 | 413 (9.5)                         |
| Commercial work                          | 113 (6.5)                  | 288 (6.6)                         |
| Agriculture and forestry                 | 50 (2.9)                   | 214 (4.9)                         |
| Transport                                | 60 (3.4)                   | 269 (6.2)                         |
| Industrial and construction work, mining | 309 (17.8)                 | 1 146 (26.4)                      |
| Service work                             | 204 (11.7)                 | 889 (20.5)                        |

503

Table 2. Comparison of work participation (%) between partial and full sick leave group (GLM repeated measures design).

| Work participation (%)                      |        |                                               |                                               |                                             |       |                                           |             |       |
|---------------------------------------------|--------|-----------------------------------------------|-----------------------------------------------|---------------------------------------------|-------|-------------------------------------------|-------------|-------|
|                                             | n      | Pre-intervention period ( T1)<br>Mean (95%CI) | Post-intervention period (T2)<br>Mean (95%CI) | Post-Pre difference (T2-T1)<br>Mean (95%CI) | p     | Difference in differences<br>Mean (95%CI) | F-statistic | p     |
| <b>All<sup>1</sup></b>                      |        |                                               |                                               |                                             |       |                                           |             |       |
| Partial sick leave                          | 1 685  | 86.6 (85.2 to 88.1)                           | 65.4 (63.4 to 67.4)                           | -21.2 (-23.4 to -19.1)                      | 0.001 | 5.3 (3.1 to 7.5)                          | 22.8        | 0.001 |
| Full sick leave                             | 56 406 | 79.4 (79.1 to 79.6)                           | 52.9 (52.5 to 53.2)                           | -26.5 (-26.9 to -26.2)                      | 0.001 |                                           |             |       |
| <b>Males<sup>2</sup></b>                    |        |                                               |                                               |                                             |       |                                           |             |       |
| Partial sick leave                          | 490    | 86.6 (84.0 to 89.1)                           | 62.7 (59.0 to 66.5)                           | -23.9 (-27.9 to -19.9)                      | 0.001 | 6.3 (2.3 to 10.3)                         | 9.3         | 0.002 |
| Full sick leave                             | 26 507 | 80.3 (80.0 to 80.7)                           | 50.2 (49.7 to 50.7)                           | -30.1 (-30.7 to -29.6)                      | 0.001 |                                           |             |       |
| <b>Females<sup>2</sup></b>                  |        |                                               |                                               |                                             |       |                                           |             |       |
| Partial sick leave                          | 1 195  | 85.4 (83.7 to 87.0)                           | 66.9 (64.6 to 69.3)                           | -18.4 (-21.0 to -15.9)                      | 0.001 | 4.9 (2.4 to 7.5)                          | 14.2        | 0.001 |
| Full sick leave                             | 29 889 | 78.6 (78.2 to 78.9)                           | 55.2 (54.7 to 55.7)                           | -23.4 (-23.9 to -22.9)                      | 0.001 |                                           |             |       |
| <b>16-34 years<sup>1</sup></b>              |        |                                               |                                               |                                             |       |                                           |             |       |
| Partial sick leave                          | 210    | 89.3 (85.8 to 92.8)                           | 75.5 (70.2 to 80.9)                           | -13.8 (-19.6 to -8.0)                       | 0.001 | 2.8 (-1.1 to 10.6)                        | 2.5         | 0.111 |
| Full sick leave                             | 10 759 | 84.6 (84.1 to 85.1)                           | 66.1 (65.3 to 66.8)                           | -16.6 (-20.8 to -12.5)                      | 0.001 |                                           |             |       |
| <b>35-44 years<sup>1</sup></b>              |        |                                               |                                               |                                             |       |                                           |             |       |
| Partial sick leave                          | 424    | 84.7 (81.9 to 87.5)                           | 68.1 (64.2 to 72.0)                           | -16.6 (-20.8 to -12.5)                      | 0.001 | 2.0 (-2.2 to 6.2)                         | 0.9         | 0.352 |
| Full sick leave                             | 11 177 | 78.4 (77.9 to 79.0)                           | 59.8 (59.1 to 60.5)                           | -18.6 (-19.4 to -17.8)                      | 0.001 |                                           |             |       |
| <b>45-54 years<sup>1</sup></b>              |        |                                               |                                               |                                             |       |                                           |             |       |
| Partial sick leave                          | 725    | 86.9 (84.7 to 89.0)                           | 65.7 (62.6 to 68.8)                           | -21.1 (-24.4 to -17.9)                      | 0.001 | 4.7 (1.4 to 8.0)                          | 7.9         | 0.005 |
| Full sick leave                             | 18 659 | 77.6 (77.2 to 78.1)                           | 51.8 (51.2 to 52.4)                           | -25.9 (-26.5 to -25.2)                      | 0.001 |                                           |             |       |
| <b>55-65 years<sup>1</sup></b>              |        |                                               |                                               |                                             |       |                                           |             |       |
| Partial sick leave                          | 326    | 89.6 (86.3 to 92.9)                           | 57.0 (52.3 to 61.7)                           | -32.6 (-37.7 to -27.5)                      | 0.001 | 5.7 (0.5 to 10.8)                         | 4.7         | 0.03  |
| Full sick leave                             | 15 811 | 78.5 (78.0 to 78.9)                           | 40.2 (39.5 to 40.8)                           | -38.3 (-39.0 to -37.6)                      | 0.001 |                                           |             |       |
| <b>Musculoskeletal diseases<sup>3</sup></b> |        |                                               |                                               |                                             |       |                                           |             |       |
| Partial sick leave                          | 598    | 87.0 (84.8 to 89.3)                           | 60.3 (57.0 to 63.6)                           | -26.7 (-30.3 to -23.2)                      | 0.001 | 0.7 (-2.9 to 4.3)                         | 0.14        | 0.712 |
| Full sick leave                             | 20 537 | 79.7 (79.4 to 80.1)                           | 52.3 (51.7 to 52.9)                           | -27.4 (-28.0 to -26.8)                      | 0.001 |                                           |             |       |
| <b>Mental disorders<sup>3</sup></b>         |        |                                               |                                               |                                             |       |                                           |             |       |
| Partial sick leave                          | 645    | 84.6 (82.2 to 87.1)                           | 67.0 (63.8 to 70.3)                           | -17.6 (-21.3 to -13.9)                      | 0.001 | 12.8 (9.0 to 16.5)                        | 43.8        | 0.001 |
| Full sick leave                             | 14 136 | 74.6 (74.0 to 75.1)                           | 44.2 (43.5 to 44.9)                           | -30.4 (-31.1 to -29.6)                      | 0.001 |                                           |             |       |

Table 2. Continued.

| Work participation (%)                         |        |                                               |                                               |                                             |       |                                           |             |       |
|------------------------------------------------|--------|-----------------------------------------------|-----------------------------------------------|---------------------------------------------|-------|-------------------------------------------|-------------|-------|
|                                                | n      | Pre-intervention period ( T1)<br>Mean (95%CI) | Post-intervention period (T2)<br>Mean (95%CI) | Post-Pre difference (T2-T1)<br>Mean (95%CI) | p     | Difference in differences<br>Mean (95%CI) | F-statistic | p     |
| <b>Traumas<sup>3</sup></b>                     |        |                                               |                                               |                                             |       |                                           |             |       |
| Partial sick leave                             | 132    | 86.7 (82.0 to 91.3)                           | 68.1 (61.5 to 74.6)                           | -18.6 (-25.3 to -11.8)                      | 0.001 | -3.2 (-10.0 to 3.5)                       | 0.89        | 0.348 |
| Full sick leave                                | 8 312  | 82.9 (82.3 to 91.3)                           | 67.6 (66.7 to 68.4)                           | -15.3 (-16.2 to -14.5)                      | 0.001 |                                           |             |       |
| <b>Tumours<sup>3</sup></b>                     |        |                                               |                                               |                                             |       |                                           |             |       |
| Partial sick leave                             | 109    | 90.6 (85.9 to 95.4)                           | 75.0 (67.4 to 82.5)                           | -15.7 (-23.5 to -7.9)                       | 0.001 | 5.3 (-2.6 to 13.2)                        | 1.7         | 0.190 |
| Full sick leave                                | 3 021  | 87.2 (86.3 to 88.1)                           | 66.2 (64.8 to 67.6)                           | -21.0 (-22.4 to -19.5)                      | 0.001 |                                           |             |       |
| <b>Other diagnostic categories<sup>3</sup></b> |        |                                               |                                               |                                             |       |                                           |             |       |
| Partial sick leave                             | 201    | 87.4 (83.4 to 91.4)                           | 63.6 (57.8 to 69.4)                           | -23.8 (-30.0 to -17.6)                      | 0.001 | 6.2 (-0.05 to 12.5)                       | 3.8         | 0.052 |
| Full sick leave                                | 10 400 | 80.2 (79.6 to 80.7)                           | 50.1 (49.3 to 50.9)                           | -30.0 (-30.9 to -29.2)                      | 0.001 |                                           |             |       |

Adjusted for <sup>1</sup> age, sex, income, diagnosis, occupational group, insurance district, <sup>2</sup> age, income, diagnosis, occupational group, insurance district, <sup>3</sup> age, sex, income, occupational group, insurance district.



Table 3. Comparison of work participation (%) between partial and full sick leave group (GLM repeated measures design) in the PS-matched subsample.

| <b>Work participation (%)</b>                  |           |                                            |             |        |
|------------------------------------------------|-----------|--------------------------------------------|-------------|--------|
|                                                | n (pairs) | Difference in differences<br>Mean (95% CI) | F-statistic | p      |
| <b>All<sup>1</sup></b>                         | 1 660     | 9.8 (5.9 to 13.7)                          | 60.8        | 0.0001 |
| <b>Males<sup>2</sup></b>                       | 489       | 12.4 (6.9 to 17.9)                         | 28.1        | 0.002  |
| <b>Females<sup>2</sup></b>                     | 1 171     | 7.2 (3.1 to 11.4)                          | 34.0        | 0.0001 |
| <b>16-34 years</b>                             | 209       | 8.5 (0.5 to 16.6)                          | 9.5         | 0.002  |
| <b>35-44 years</b>                             | 422       | 6.7 (0.7 to 12.6)                          | 9.8         | 0.002  |
| <b>45-54 years</b>                             | 708       | 11.1 (6.3 to 15.9)                         | 30.3        | 0.0001 |
| <b>55-65 years</b>                             | 321       | 12.9 (6.5 to 19.4)                         | 12.2        | 0.001  |
| <b>Musculoskeletal diseases<sup>3</sup></b>    | 598       | 6.3 (1.5 to 11.2)                          | 6.0         | 0.015  |
| <b>Mental disorders<sup>3</sup></b>            | 621       | 18.9 (14.2 to 23.5)                        | 59.9        | 0.0001 |
| <b>Traumas<sup>3</sup></b>                     | 131       | 0.3 (-9.3 to 9.9)                          | 0.0         | 0.99   |
| <b>Tumours<sup>3</sup></b>                     | 109       | 12.5 (1.8 to 23.2)                         | 5.9         | 0.016  |
| <b>Other diagnostic categories<sup>3</sup></b> | 201       | 11.1 (3.3 to 18.9)                         | 7.6         | 0.006  |

Adjusted for

<sup>1</sup> age, sex, income, diagnosis, occupational group, insurance district,

<sup>2</sup> age, income, diagnosis, occupational group, insurance district,

<sup>3</sup> age, sex, income, occupational group, insurance district.

1  
2  
3  
4  
5  
6  
7  
8  
9  
10  
11  
12  
13  
14  
15  
16  
17  
18  
19  
20  
21  
22  
23  
24  
25  
26  
27  
28  
29  
30  
31  
32  
33  
34  
35  
36  
37  
38  
39  
40  
41  
42  
43  
44  
45  
46  
47  
48  
49

For peer review only

1  
2  
3  
4  
5  
6  
7  
8  
9  
10  
11  
12  
13  
14  
15  
16  
17  
18  
19  
20  
21  
22  
23  
24  
25  
26  
27  
28  
29  
30  
31  
32  
33  
34  
35  
36  
37  
38  
39  
40  
41  
42  
43  
44  
45  
46  
47  
48  
49  
50  
51  
52  
53  
54  
55  
56  
57  
58  
59  
60

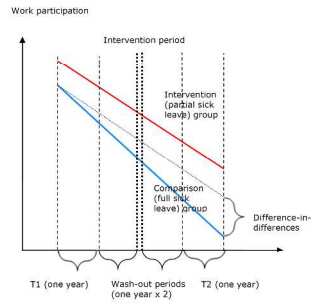

Figure. Schematic presentation of the study design and difference-in-differences method. (T1 corresponds to pre-intervention period, T2 corresponds to post-intervention period).

338x190mm (300 x 300 DPI)

review only

## APPENDIX

Table 1. Characteristics of participants in partial and full sick leave group at the time of intervention (n, %). Propensity score-matched subsample (n=1660 pairs).

|                                           | Partial sick leave        | Full sick leave           |
|-------------------------------------------|---------------------------|---------------------------|
| <b>Female (%)</b>                         | 1 171 (70.5)              | 1 171 (70.5)              |
| <b>Age (years)</b>                        |                           |                           |
| Mean (95% CI)                             | 46.1 (45.7 to 46.5)       | 46.0 (45.5 to 46.5)       |
| <b>Annual gross income (€)</b>            |                           |                           |
| Mean (95% CI)                             | 27 302 (26 754 to 27 850) | 26 274 (25 637 to 26 910) |
| <b>Diagnostic categories (%)</b>          |                           |                           |
| Mental disorders                          | 621 (37.4)                | 621 (37.4)                |
| Musculoskeletal diseases                  | 598 (36.0)                | 598 (36.0)                |
| Tumours                                   | 109 (6.6)                 | 109 (6.6)                 |
| Traumas                                   | 131 (7.9)                 | 131 (7.9)                 |
| Other                                     | 201 (12.1)                | 201 (12.1)                |
| <b>Occupational branch (%)</b>            |                           |                           |
| Technical and scientific work etc.        | 178 (10.7)                | 223 (13.4)                |
| Social and healthcare services            | 492 (29.6)                | 402 (24.2)                |
| Administration and office work            | 281 (16.9)                | 230 (13.9)                |
| Commercial work                           | 112 (6.7)                 | 137 (8.3)                 |
| Agriculture and forestry                  | 490 (3.0)                 | 71 (4.3)                  |
| Transport                                 | 58 (3.5)                  | 79 (4.8)                  |
| Industrial and construction work, mining  | 300 (18.3)                | 301 (18.1)                |
| Service work                              | 190 (11.4)                | 217 (13.1)                |
| <b>Insurance district (%)</b>             |                           |                           |
| Northern                                  | 206 (12.4)                | 234 (14.1)                |
| Western                                   | 253 (15.2)                | 221 (13.3)                |
| Eastern                                   | 188 (11.3)                | 258 (15.5)                |
| South-Western                             | 392 (23.6)                | 347 (20.9)                |
| Southern                                  | 621 (37.4)                | 600 (36.1)                |
| <b>Number of unemployment days, T1</b>    |                           |                           |
| Mean (95% CI)                             | 2.8 (1.8 to 3.8)          | 3.6 (2.5 to 4.6)          |
| <b>Number of full sick leave days, T1</b> |                           |                           |
| Mean (95% CI)                             | 17.0 (15.3 to 18.7)       | 17.9 (16.0 to 19.9)       |
| <b>Number of rehabilitation days, T1</b>  |                           |                           |
| Mean (95% CI)                             | 1.7 (0.9 to 2.5)          | 1.6 (0.8 to 2.4)          |
| <b>Work participation, T1</b>             |                           |                           |
| Mean (95% CI)                             | 94.1 (93.6 to 94.7)       | 93.7 (93.0 to 94.3)       |
